# Supplementary material
Source: MDPI journal article supplement (https://www.mdpi.com/2218-0532/90/4/63)
Supplement: s1 [file s1]

## Supplementary material

Article

### Synthesis and anticholinesterase evaluation of cassine, spectaline and analogues

Marcela C. R. Silva <sup>1</sup>, Adriana F. L. Vilela <sup>2</sup>, Carmen L. Cardoso <sup>2</sup>, Ronaldo A. Pilli <sup>1,\*</sup>

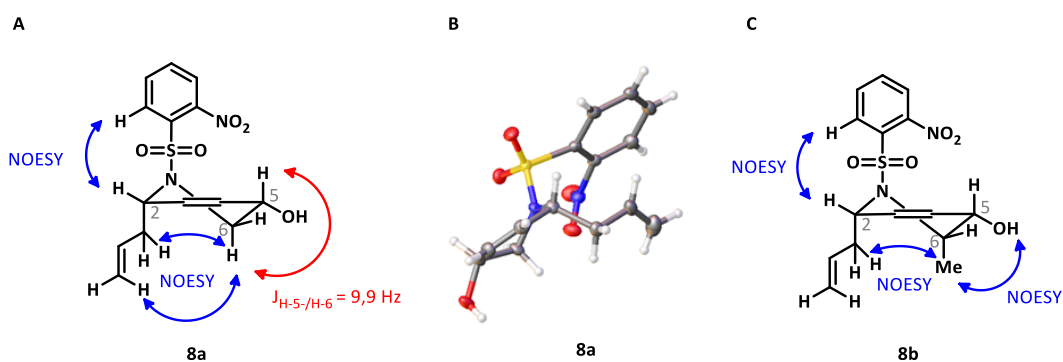

Figure S1. NOESY correlations (S1A and S1C) and coupling constants (S1A) observed by  $^1\text{H}$  RMN spectroscopy. B: Crystal structure of intermediate **8a**.

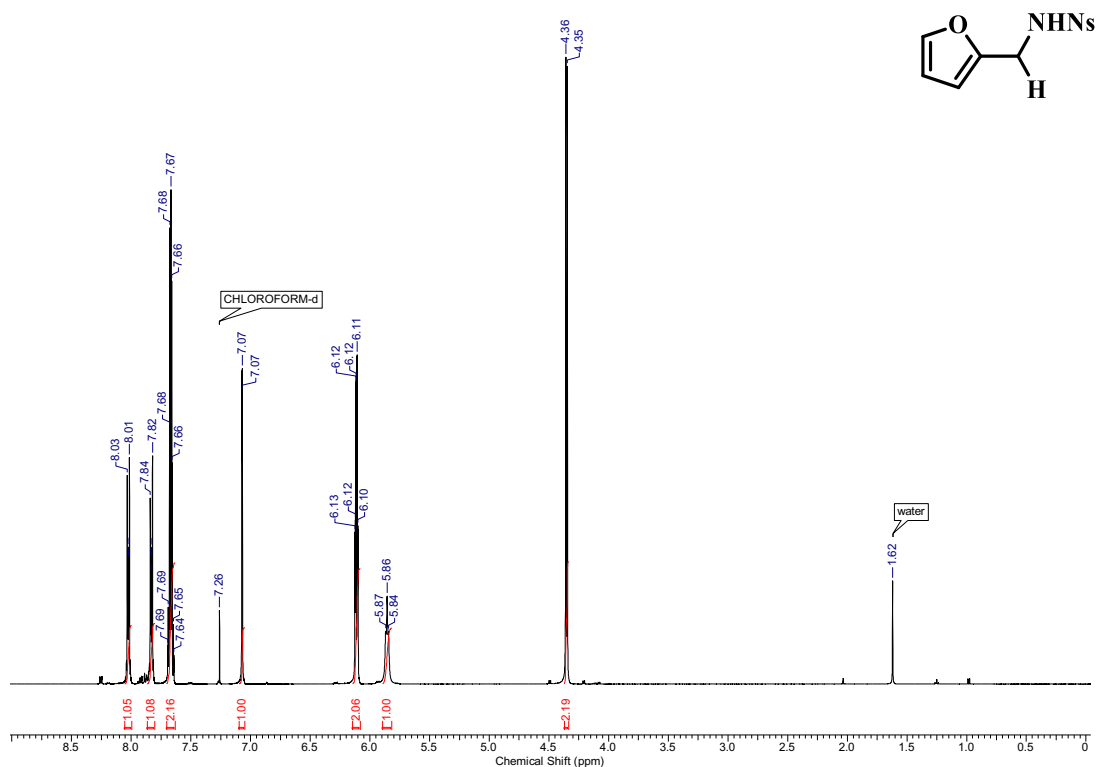

Figure S2. <sup>1</sup>H NMR spectra of compound **5a** (CDCl<sub>3</sub>, 500 MHz).

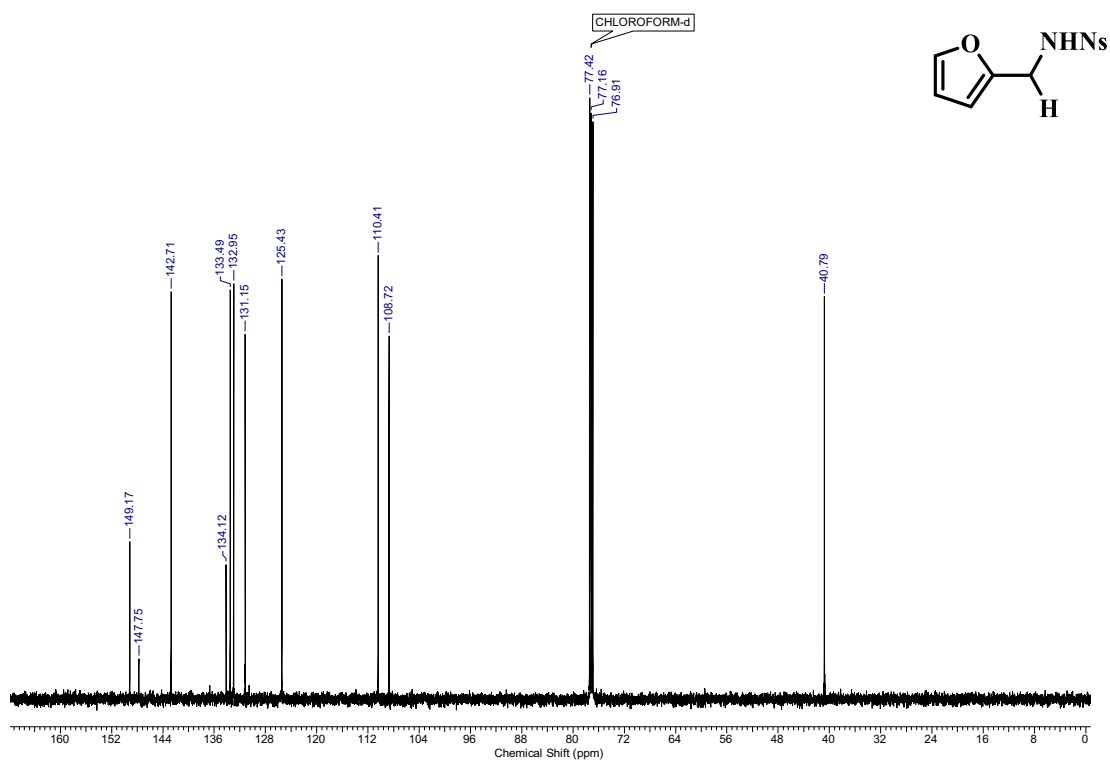

Figure S3. <sup>13</sup>C NMR spectra of compound **5a** (CDCl<sub>3</sub>, 126 MHz).

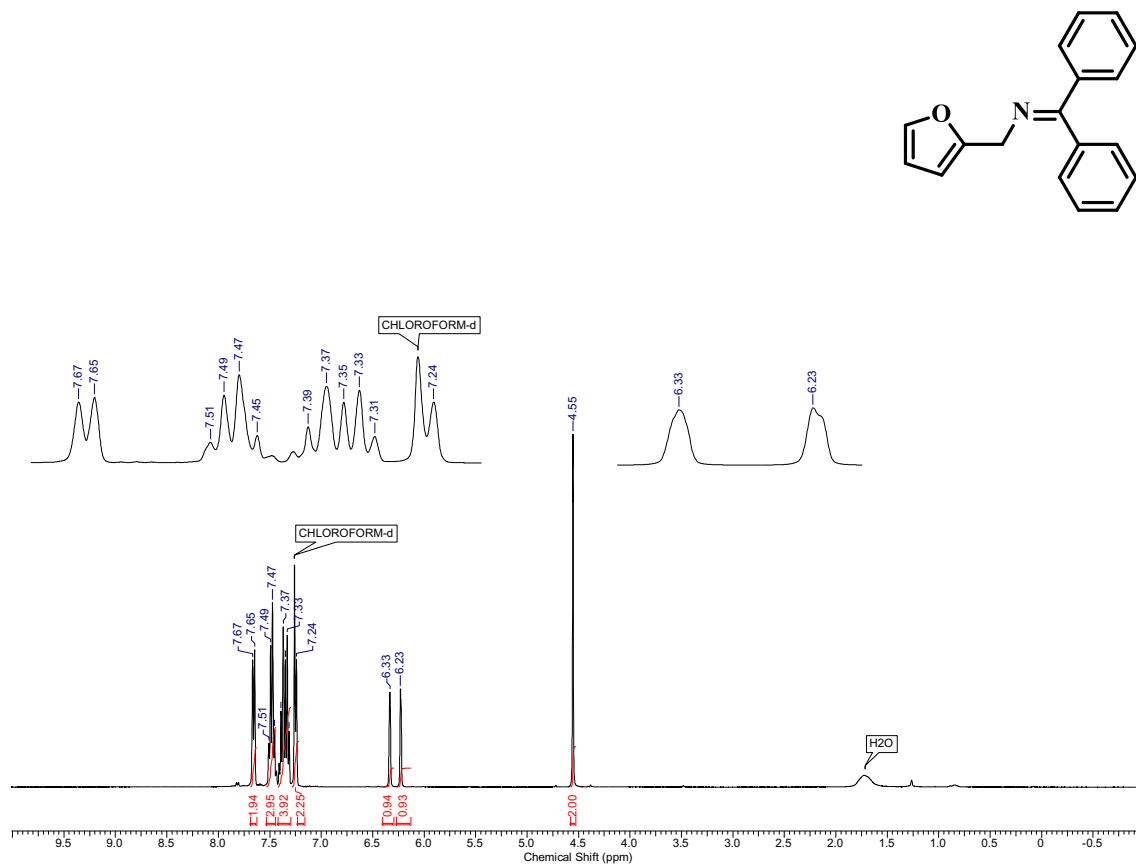

Figure S4. <sup>1</sup>H NMR spectra of compound **S-I** (CDCl<sub>3</sub>, 400 MHz).

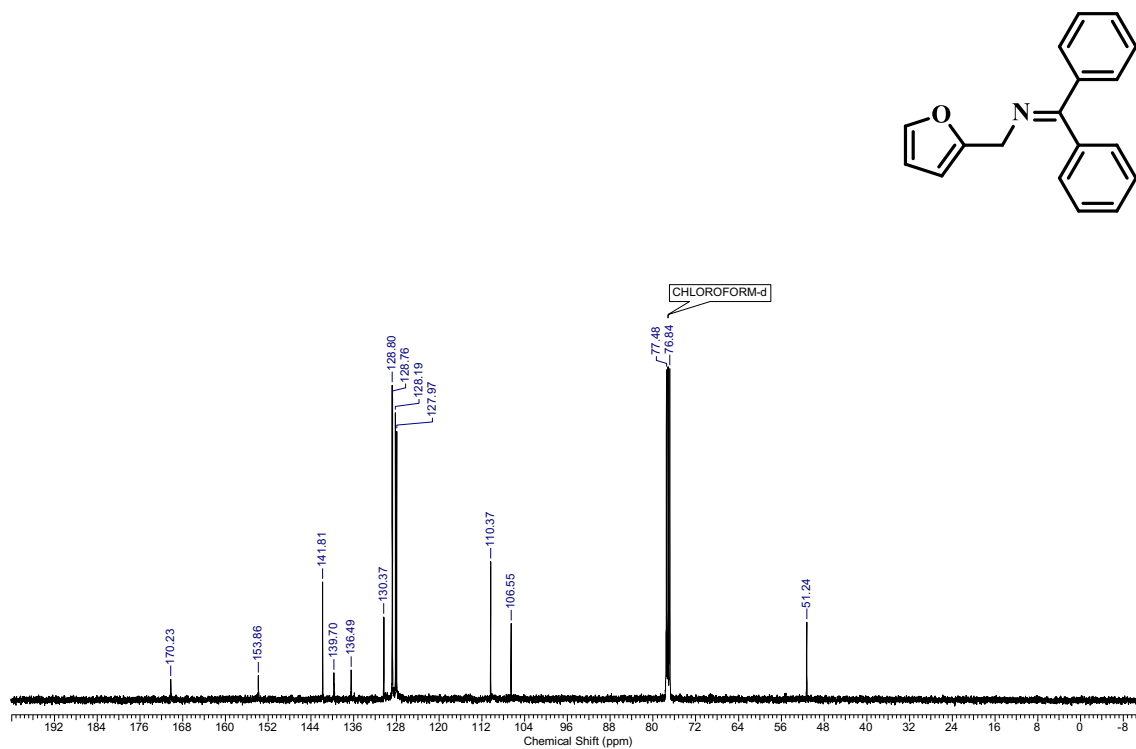

Figure S5. <sup>13</sup>C NMR spectra of compound **S-I** (CDCl<sub>3</sub>, 101 MHz).

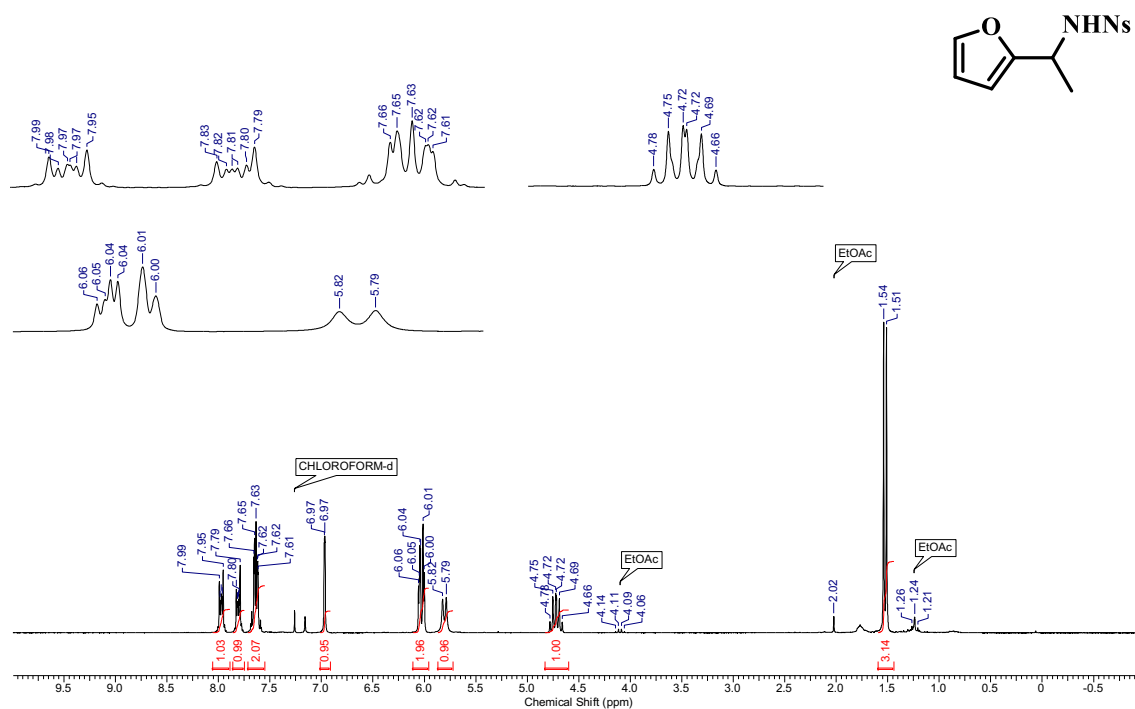

Figure S6.  $^1\text{H}$  NMR spectra of compound **5b** ( $\text{CDCl}_3$ , 250 MHz).

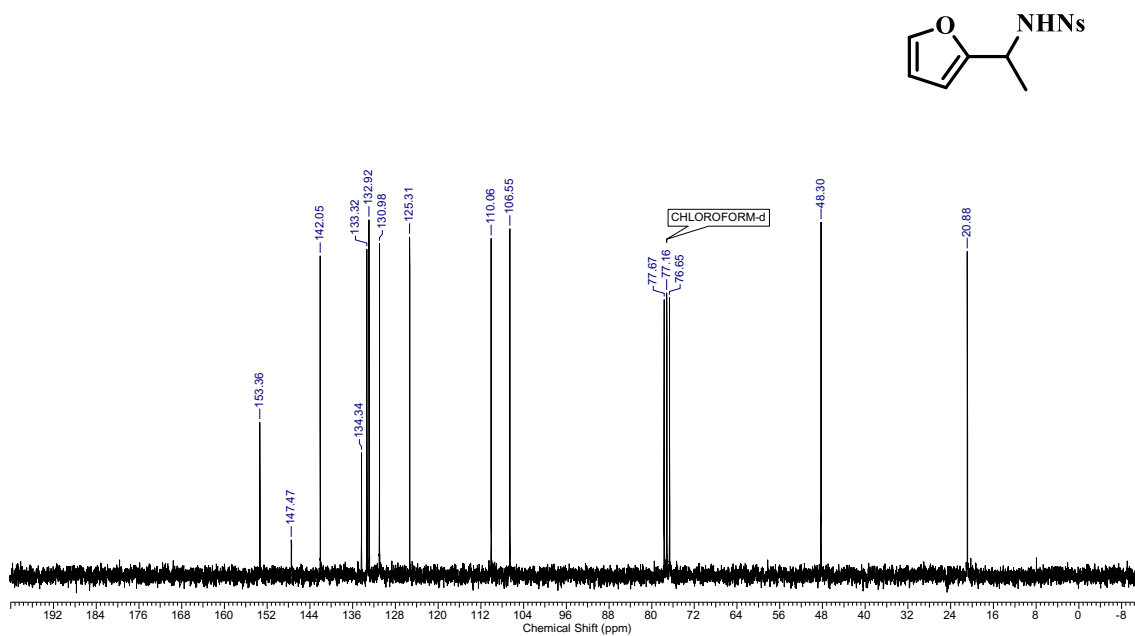

Figure S7.  $^{13}\text{C}$  NMR spectra of compound **5b** ( $\text{CDCl}_3$ , 63 MHz).

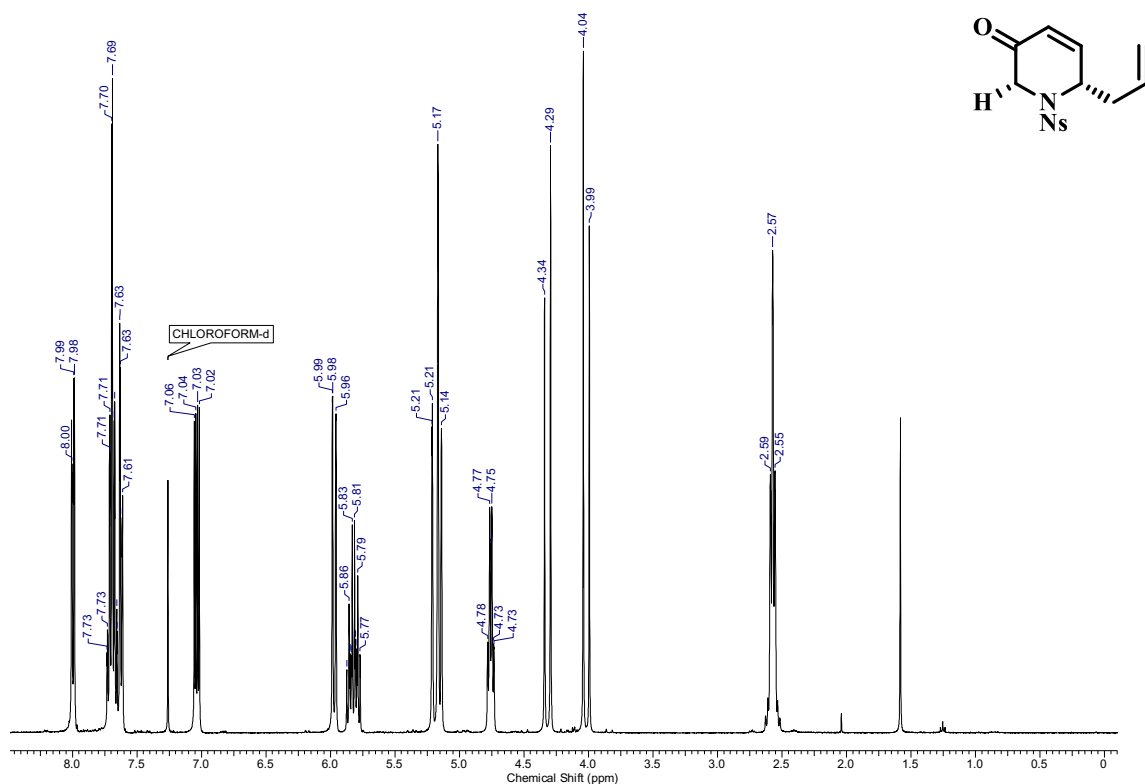

Figure S8. <sup>1</sup>H NMR spectra of compound **7a** (CDCl<sub>3</sub>, 400 MHz).

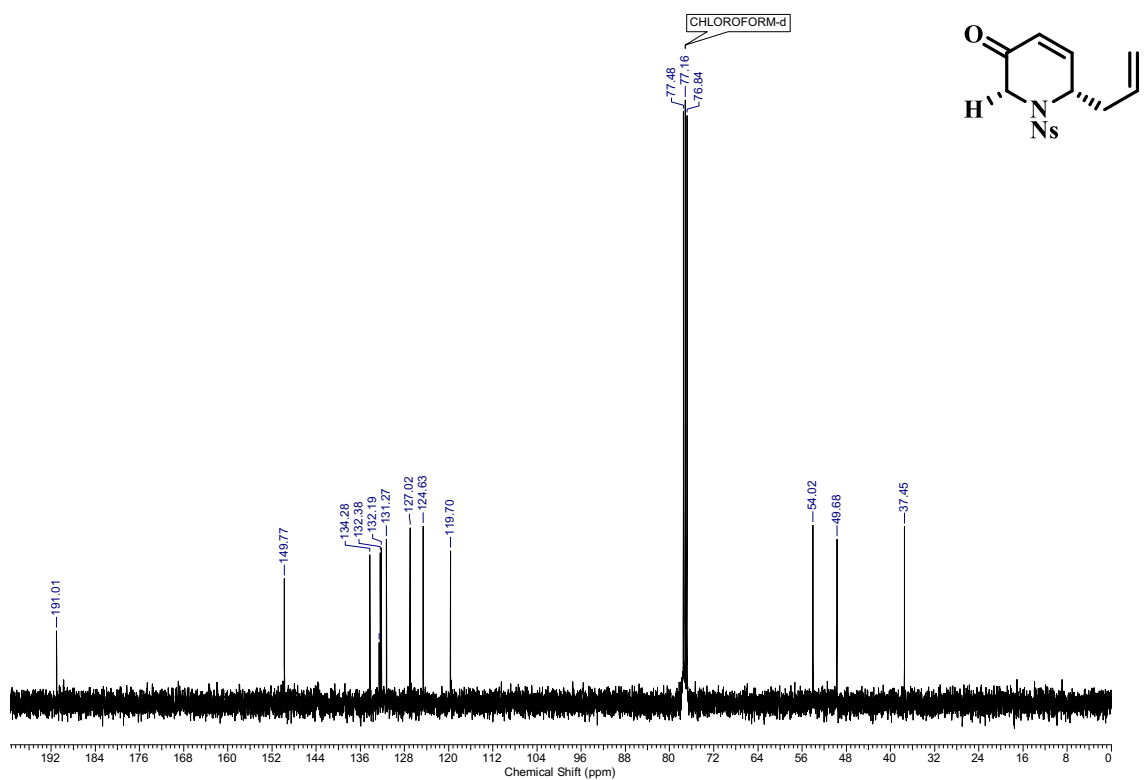

Figure S9. <sup>13</sup>C NMR spectra of compound **7a** (CDCl<sub>3</sub>, 101 MHz).

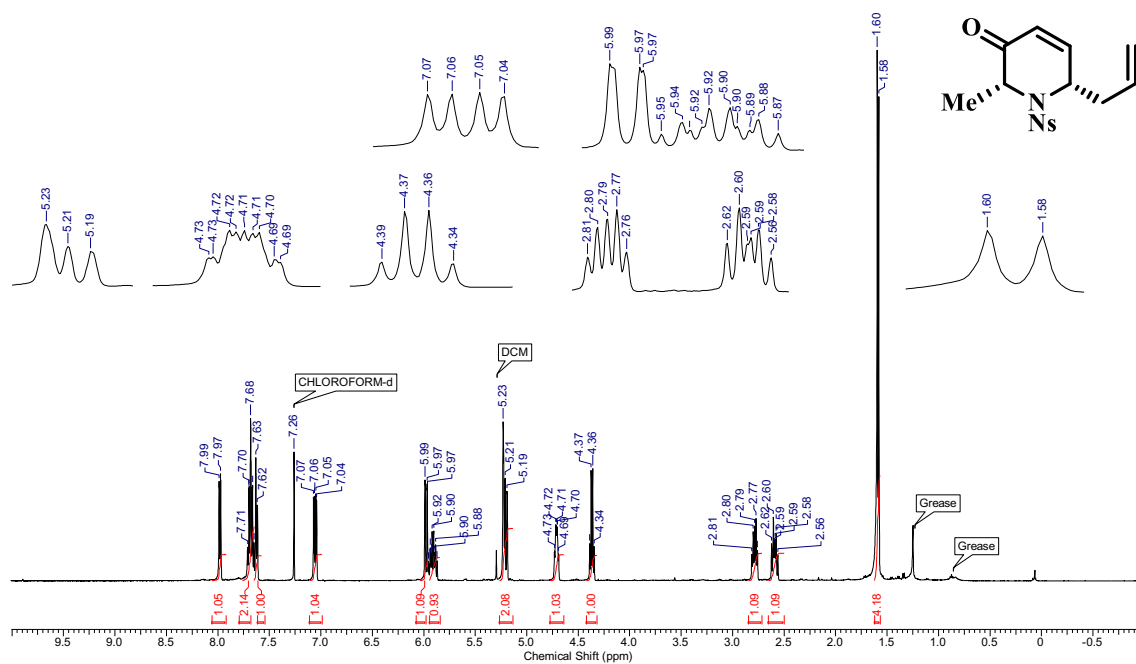

Figure S10. <sup>1</sup>H NMR spectra of compound **7b** (CDCl<sub>3</sub>, 500 MHz).

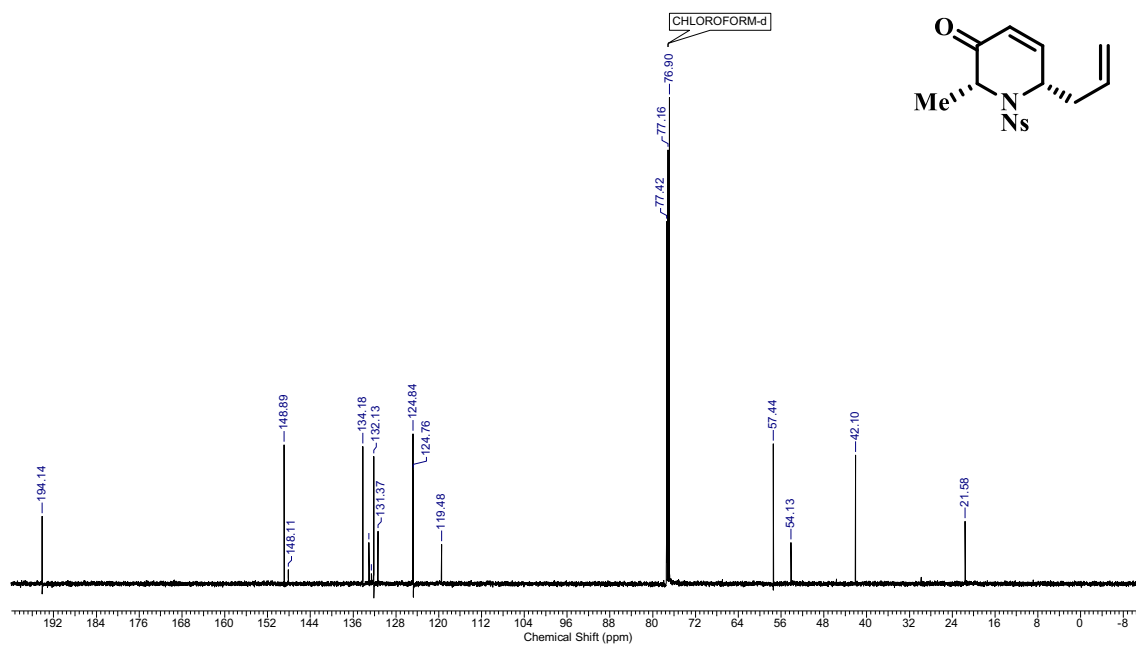

Figure S11. <sup>13</sup>C NMR spectra of compound **7b** (CDCl<sub>3</sub>, 126 MHz).

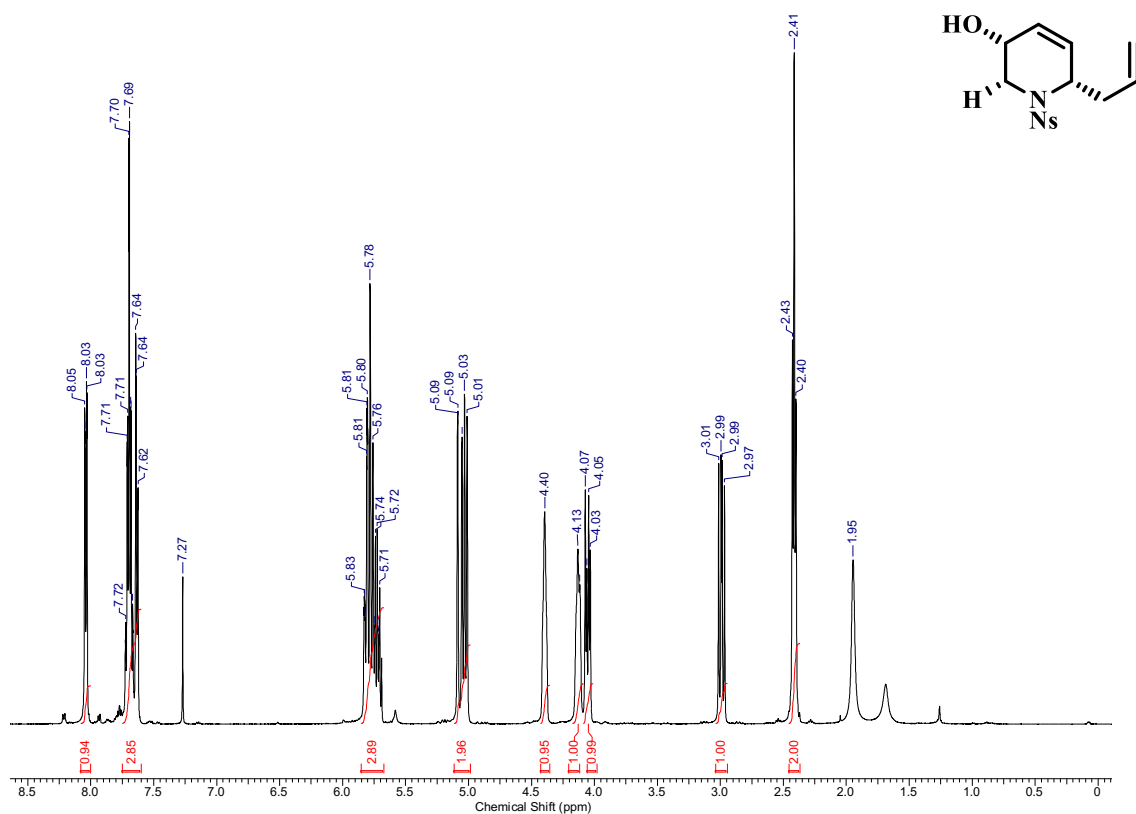

Figure S12. <sup>1</sup>H NMR spectra of compound **8a** (CDCl<sub>3</sub>, 500 MHz).

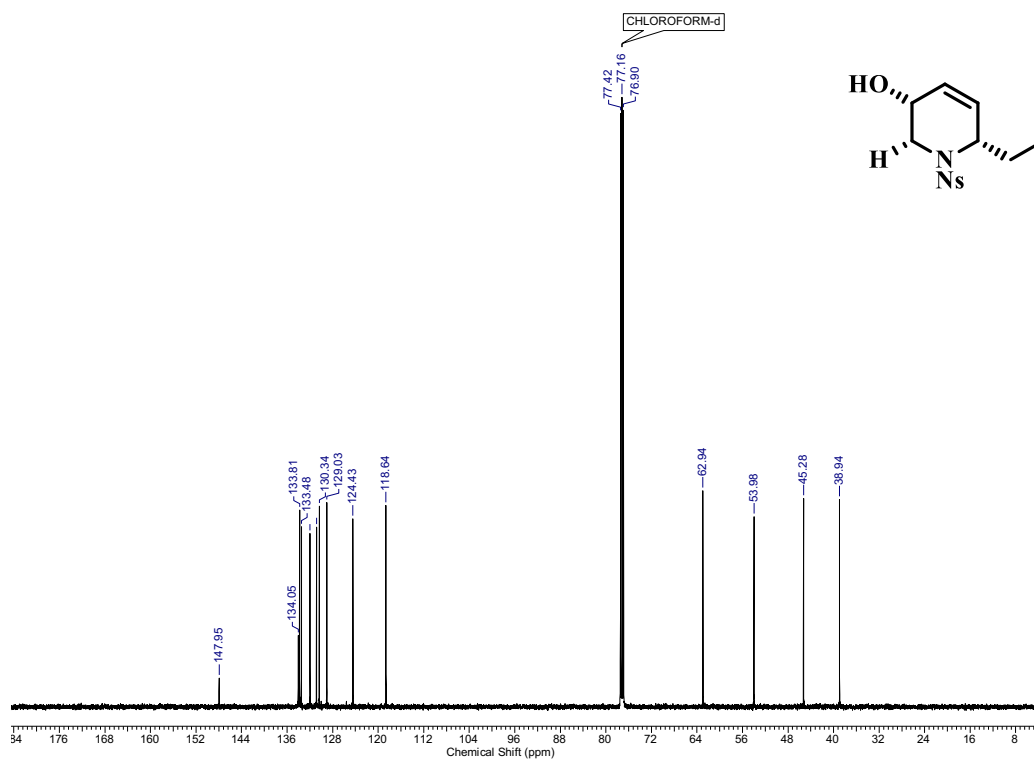

Figure S13. <sup>13</sup>C NMR spectra of compound **8a** (CDCl<sub>3</sub>, 126 MHz).

HSQC-DEPT mcr 288 out04mcrH1.003.001.2rr.esp

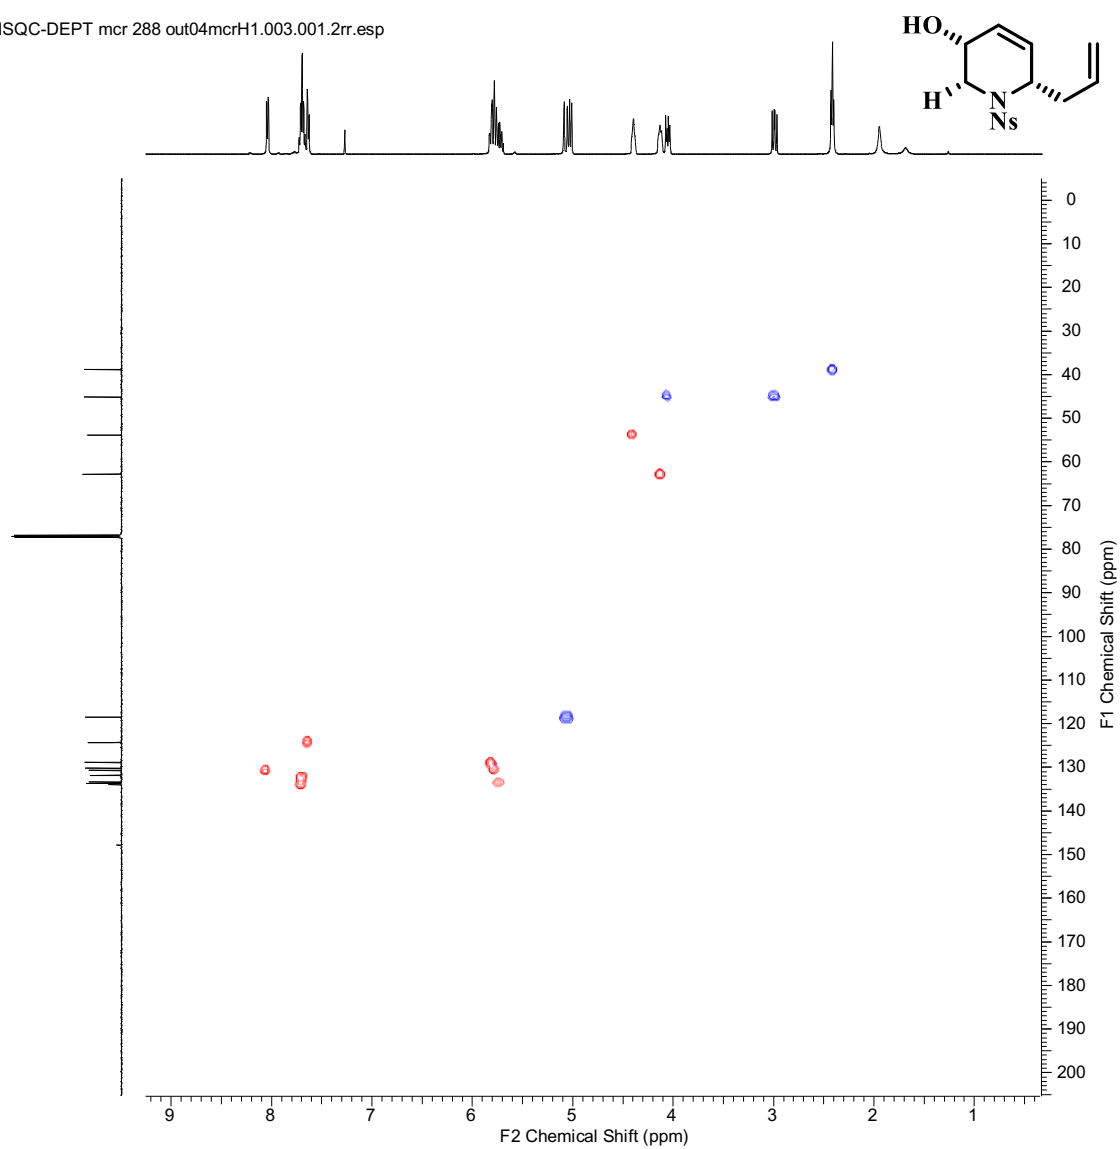

Figure S14. HSQC NMR spectra of compound **8a** (CDCl<sub>3</sub>, 500MHz).



cosy mcr 288 out04mcrH1.003.001.2rr.esp

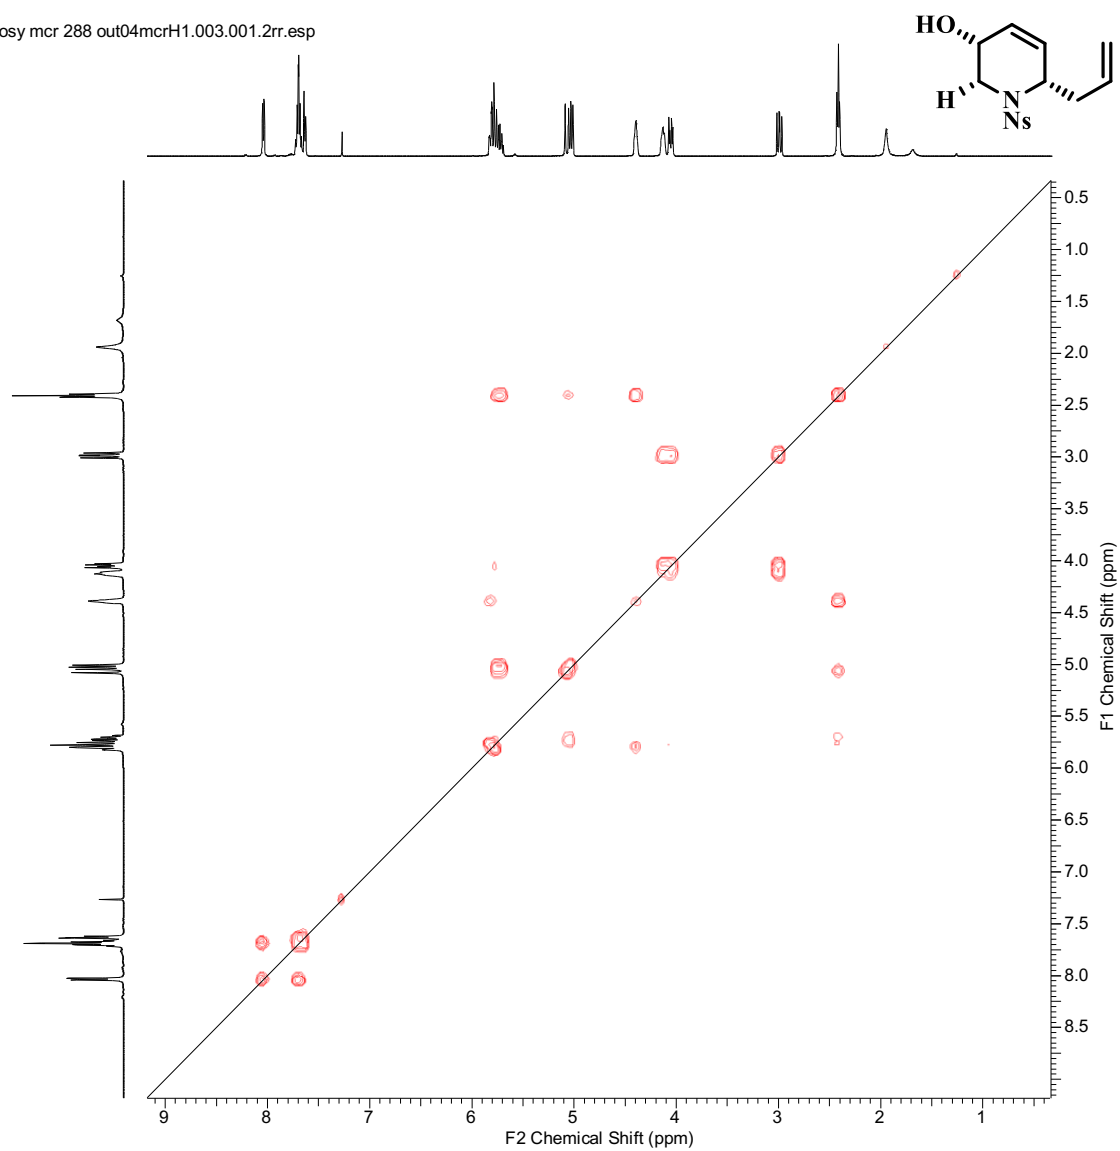

Figure S15. COSY NMR spectra of compound **8a** (CDCl<sub>3</sub>, 500MHz).

noesy mcr 288 out04mcrH1.003.001.2rr.esp

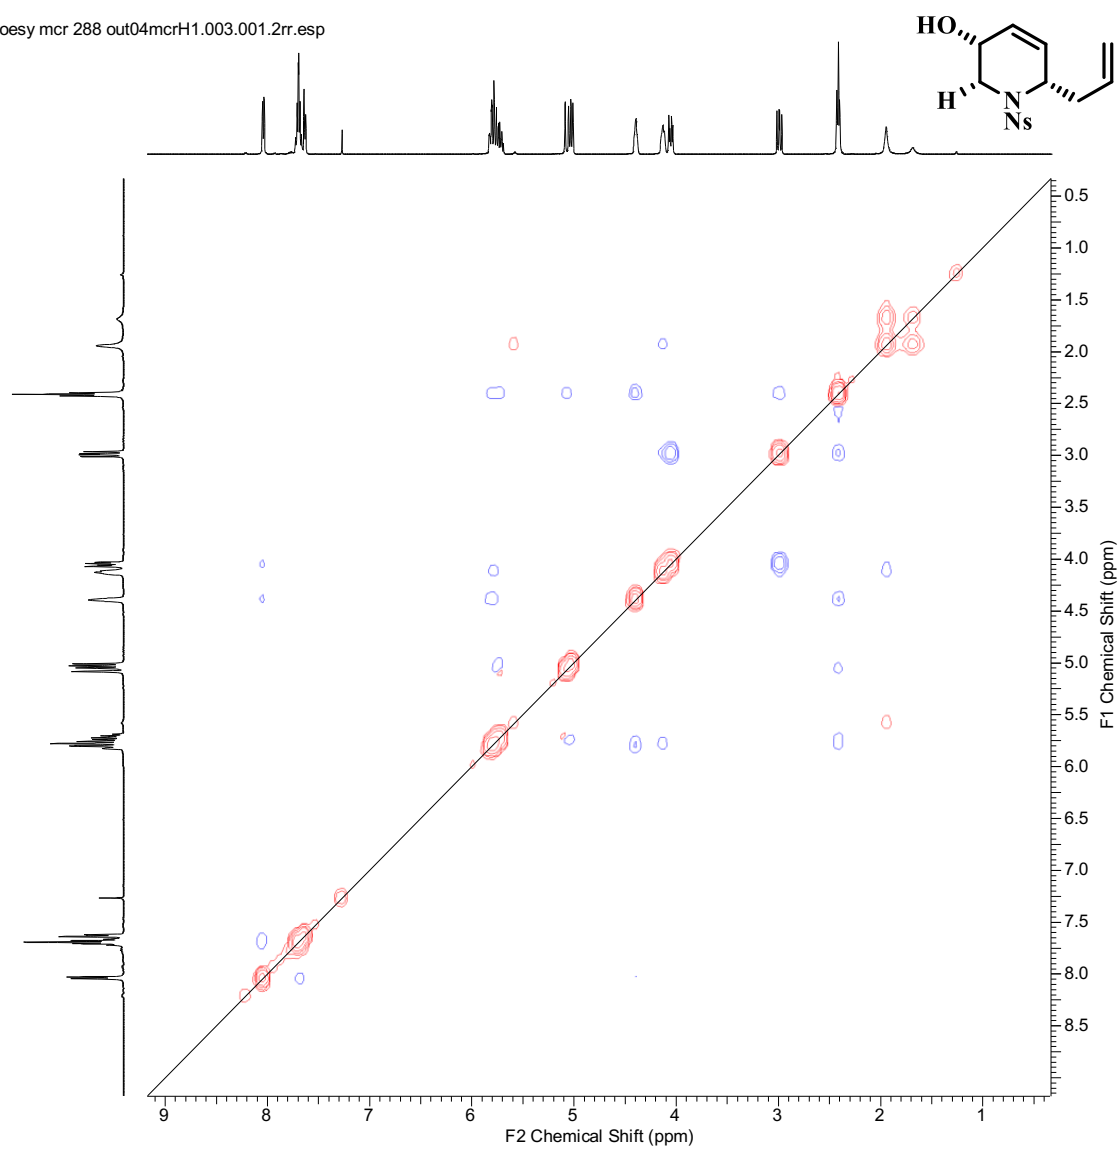

Figure S16. NOESY NMR spectra of compound **8a** (CDCl<sub>3</sub>, 500MHz).

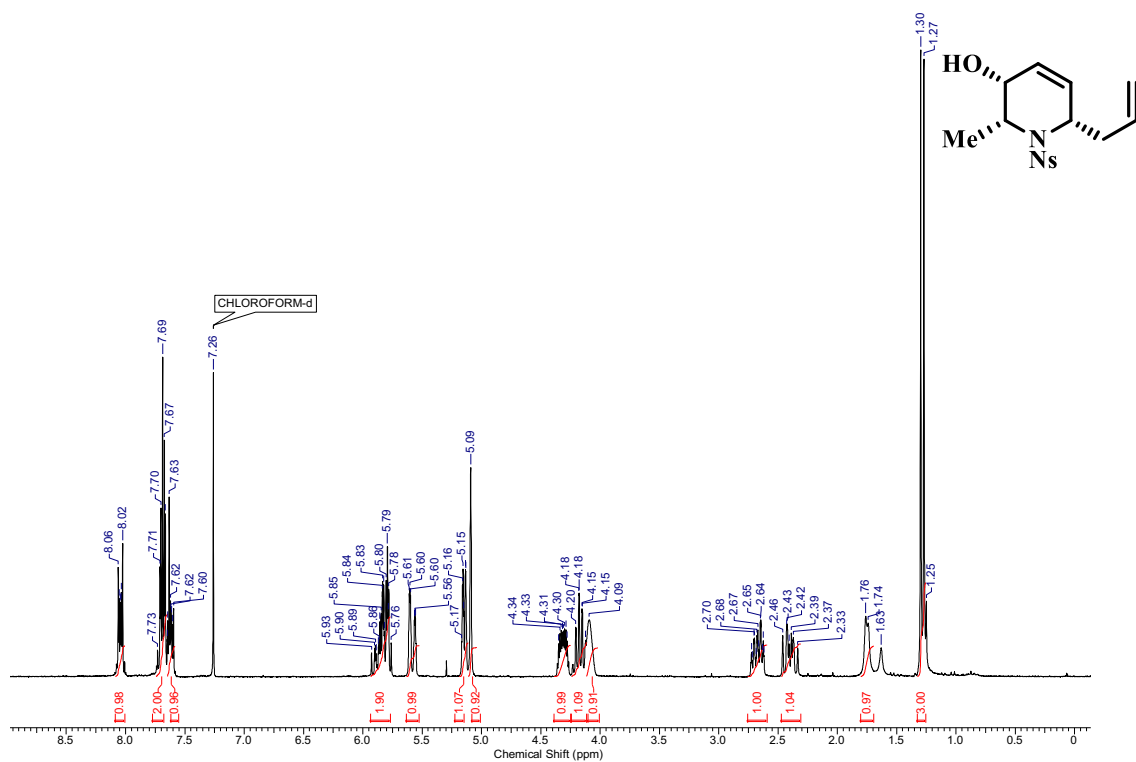

Figure S17. <sup>1</sup>H NMR spectra of compound **8b** (CDCl<sub>3</sub>, 250 MHz).

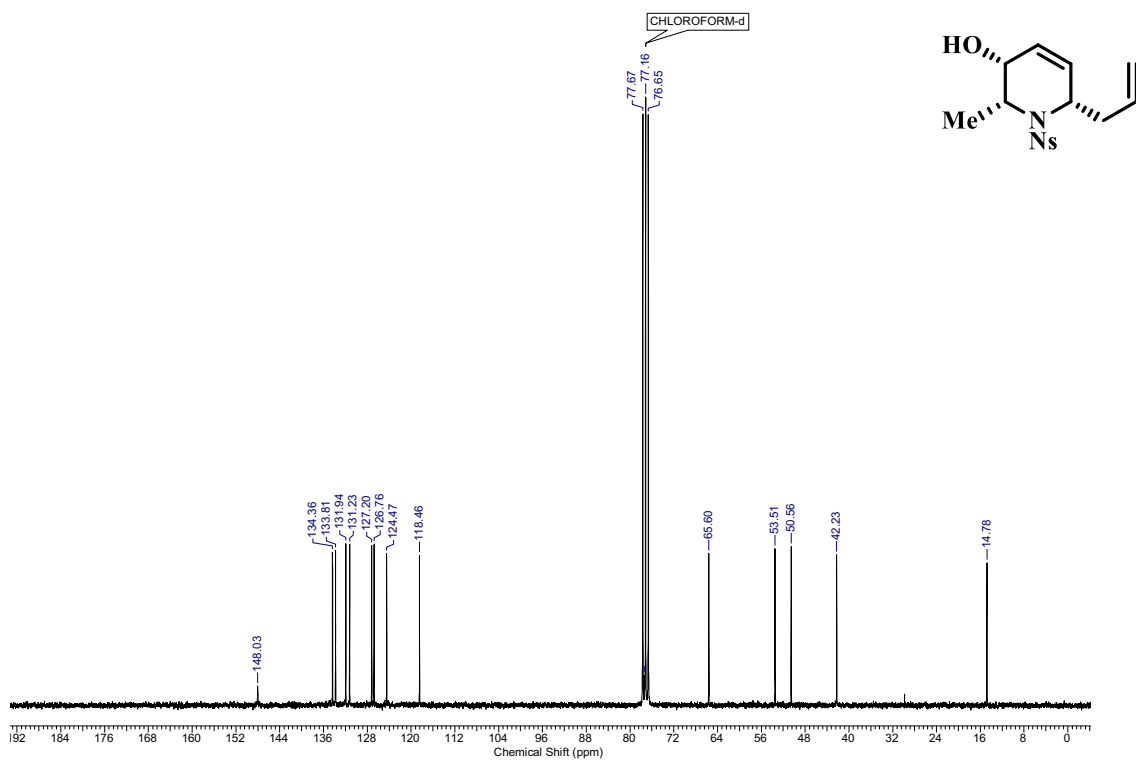

Figure S18. <sup>13</sup>C NMR spectra of compound **8b** (CDCl<sub>3</sub>, 63 MHz).

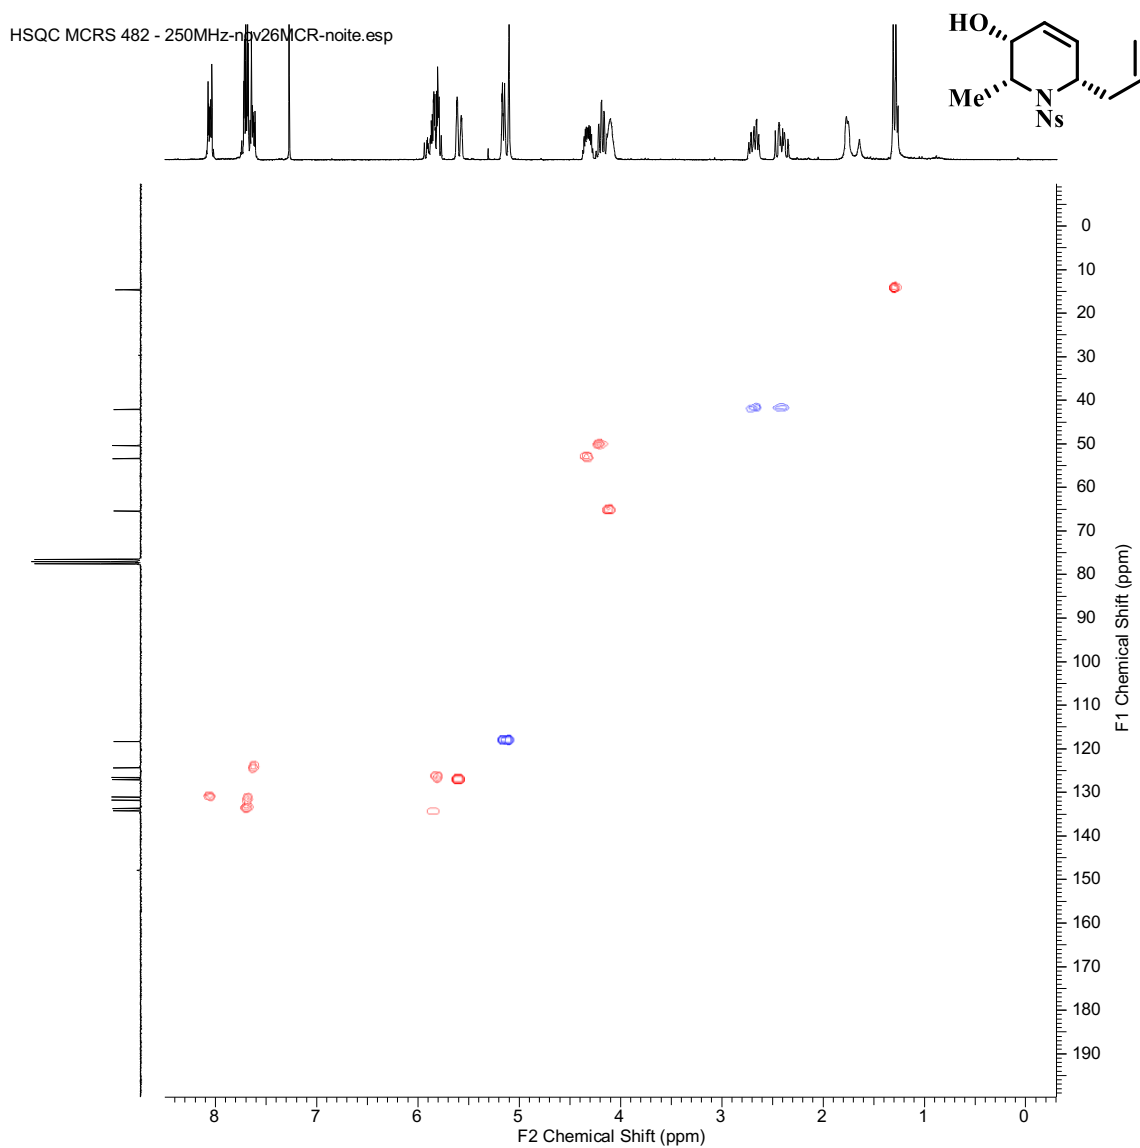

Figure S19. HSQC NMR spectra of compound **8b** (CDCl<sub>3</sub>, 500MHz).

COSY MCRS 482 - 250MHz-nov26MCR-noite.esp

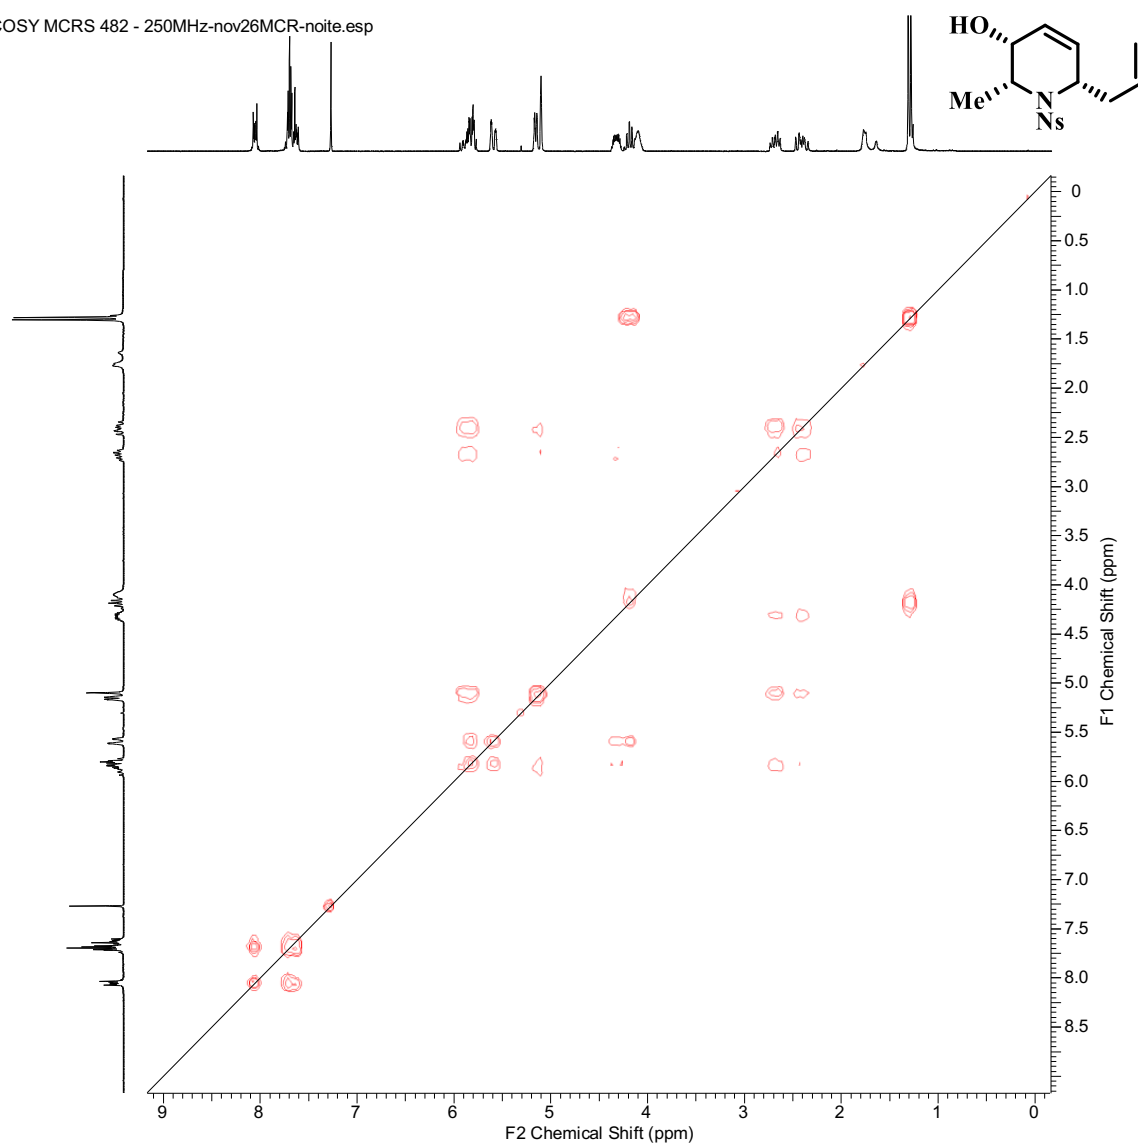

Figure S20. COSY NMR spectra of compound **8b** (CDCl<sub>3</sub>, 500MHz).

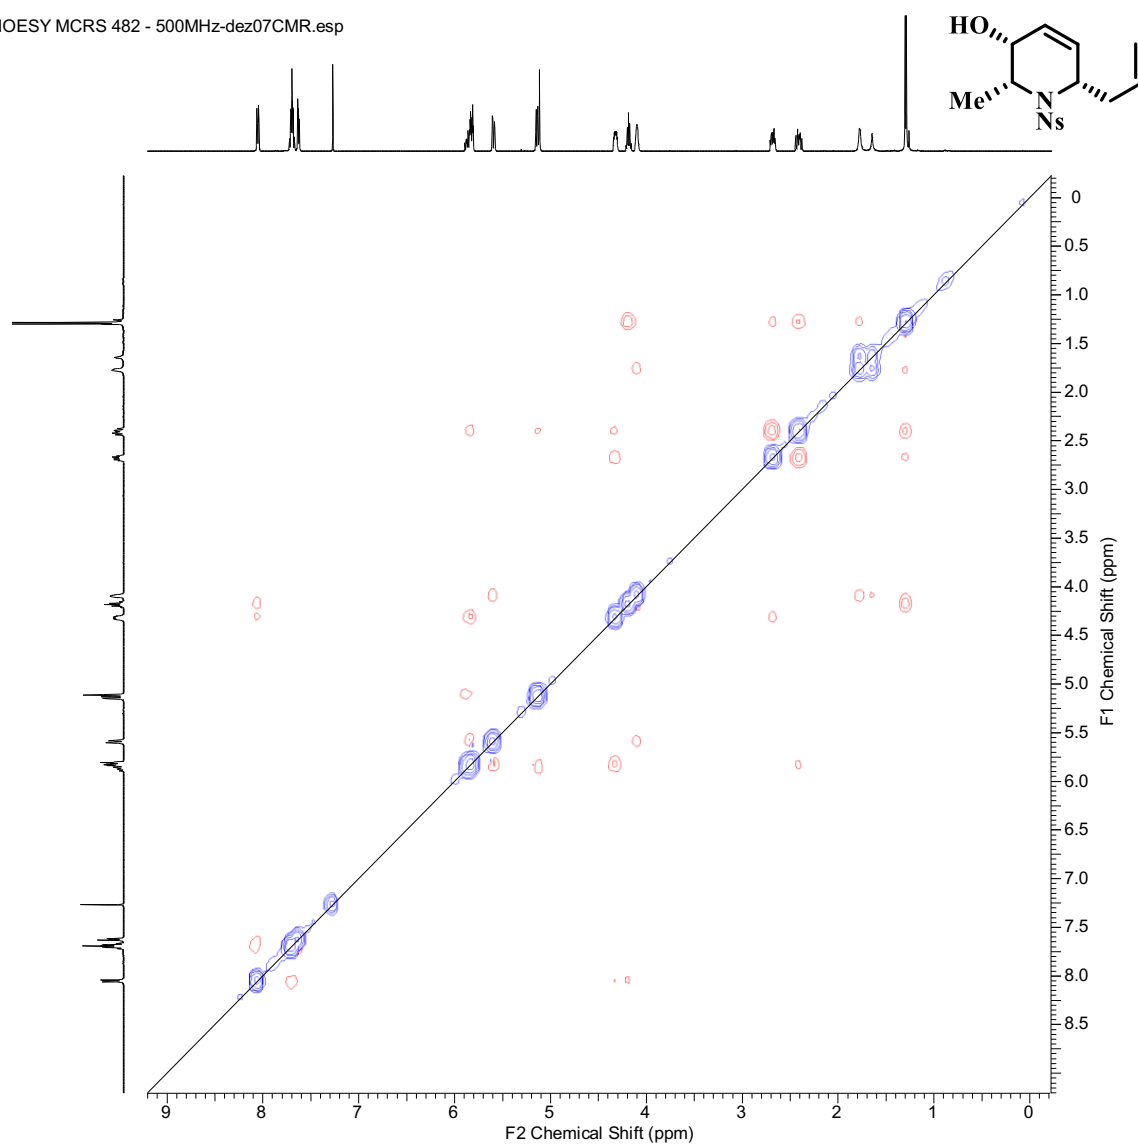

Figure S21. NOESY NMR spectra of compound **8b** (CDCl<sub>3</sub>, 500MHz).

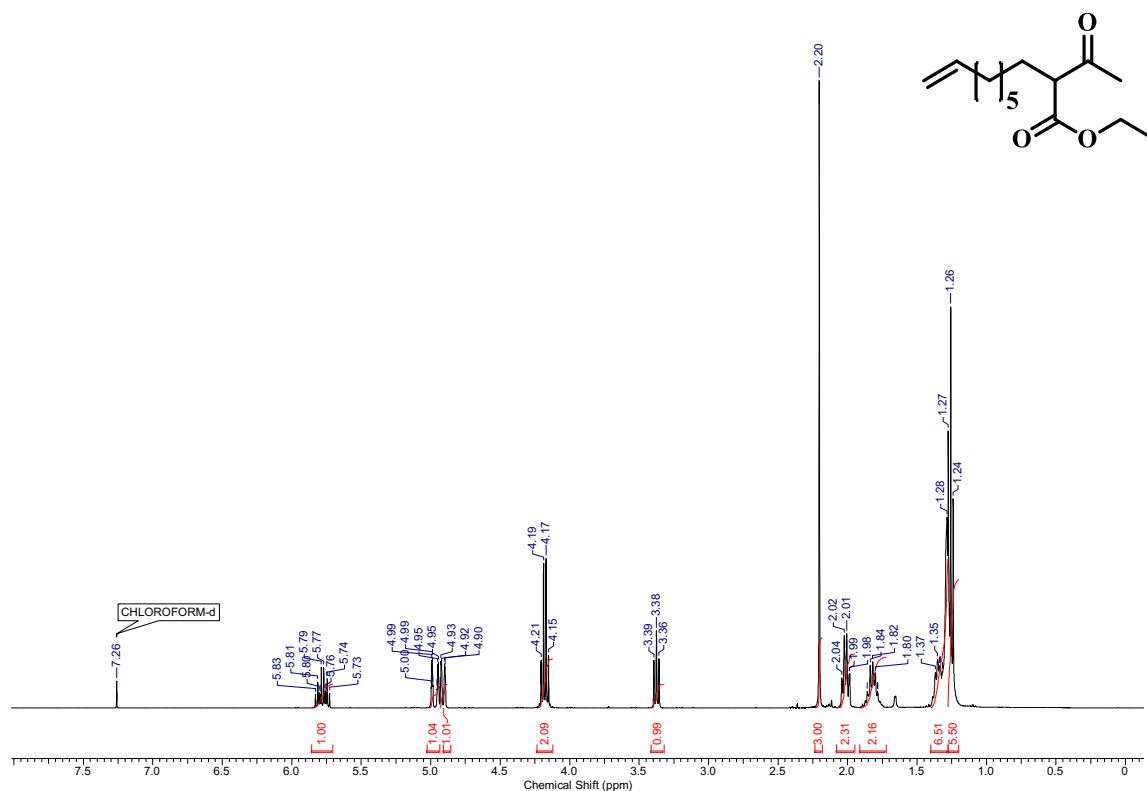

Figure S22. <sup>1</sup>H NMR spectra of compound S-IV (CDCl<sub>3</sub>, 400 MHz)

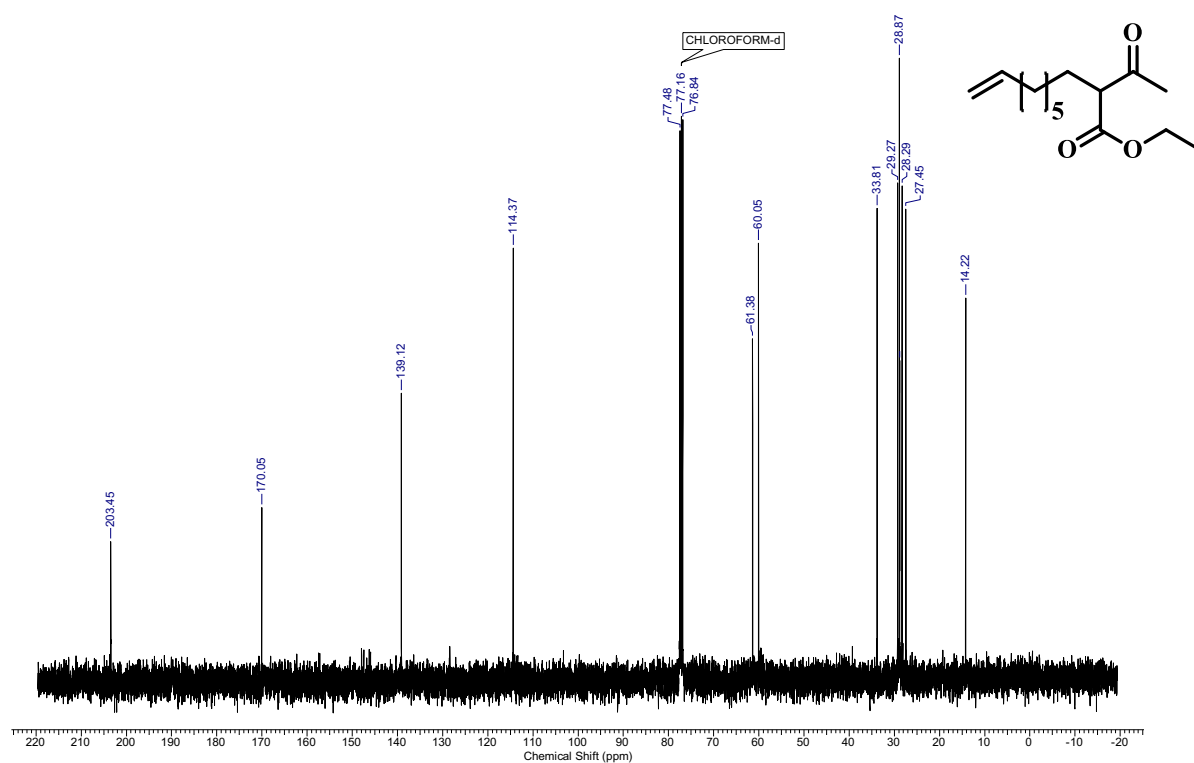

Figure S23. <sup>13</sup>C NMR spectra of compound S-IV (CDCl<sub>3</sub>, 101 MHz).

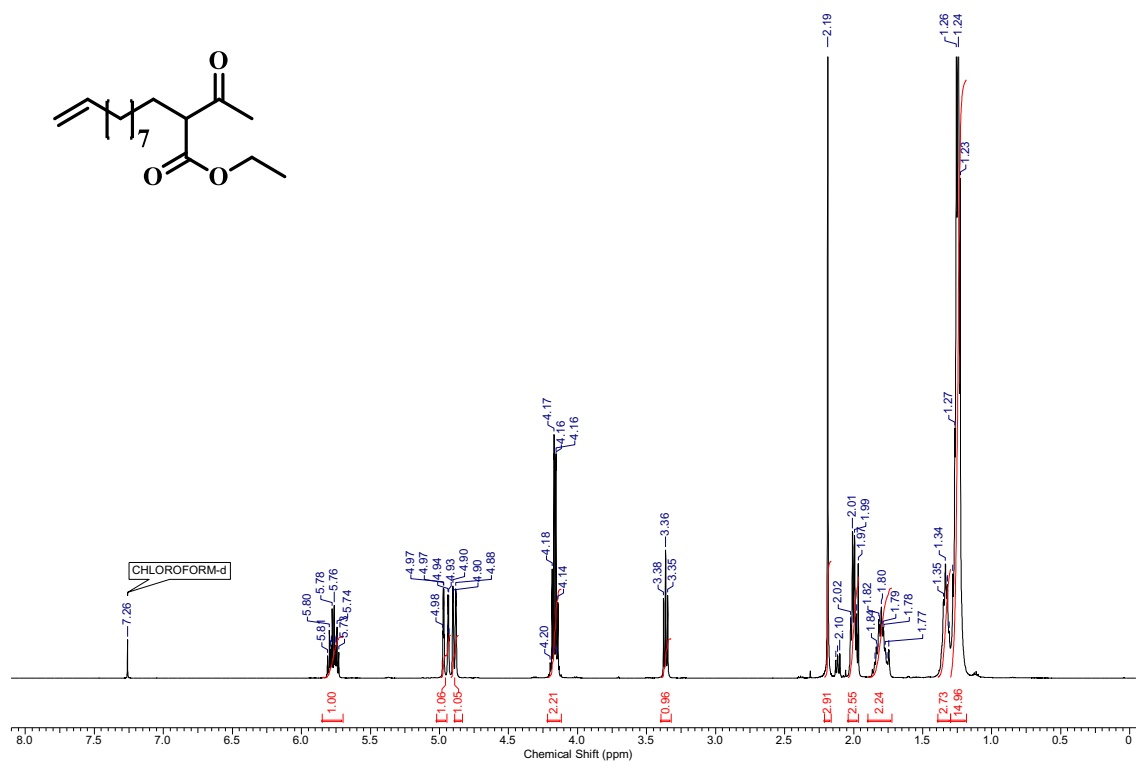

Figure S24. <sup>1</sup>H NMR spectra of compound S-V (CDCl<sub>3</sub>, 500 MHz)

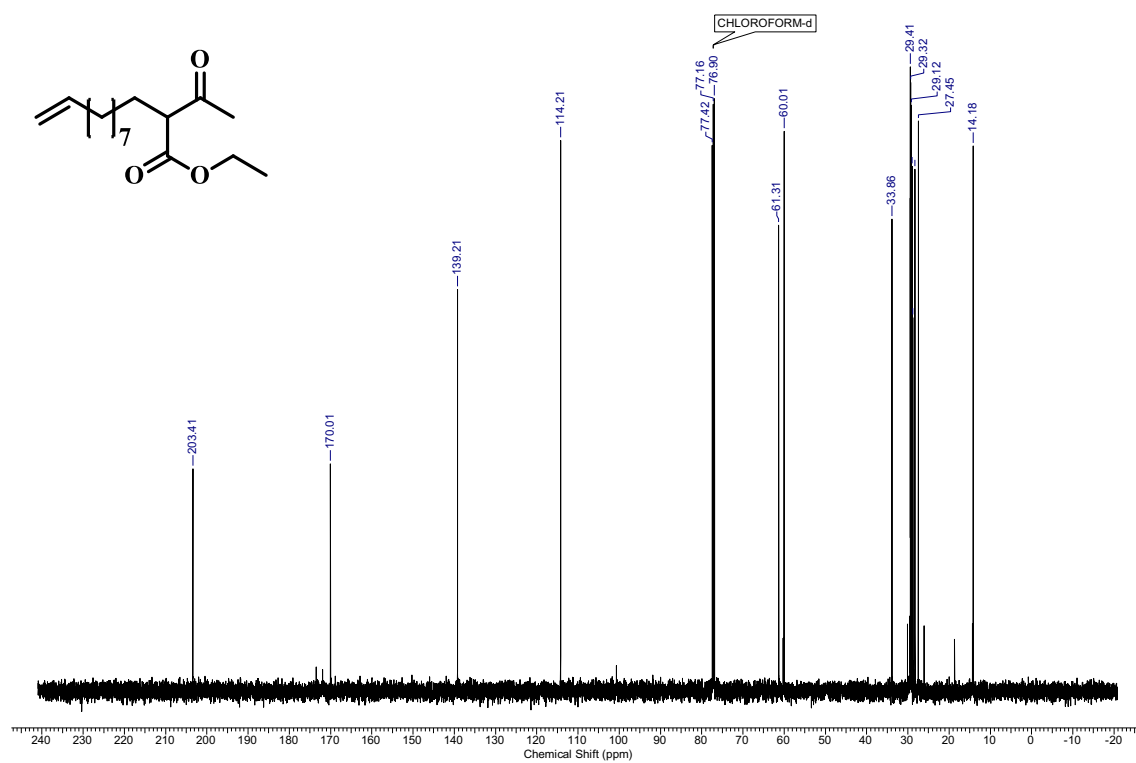

Figure S25. <sup>13</sup>C NMR spectra of compound S-V (CDCl<sub>3</sub>, 126 MHz).



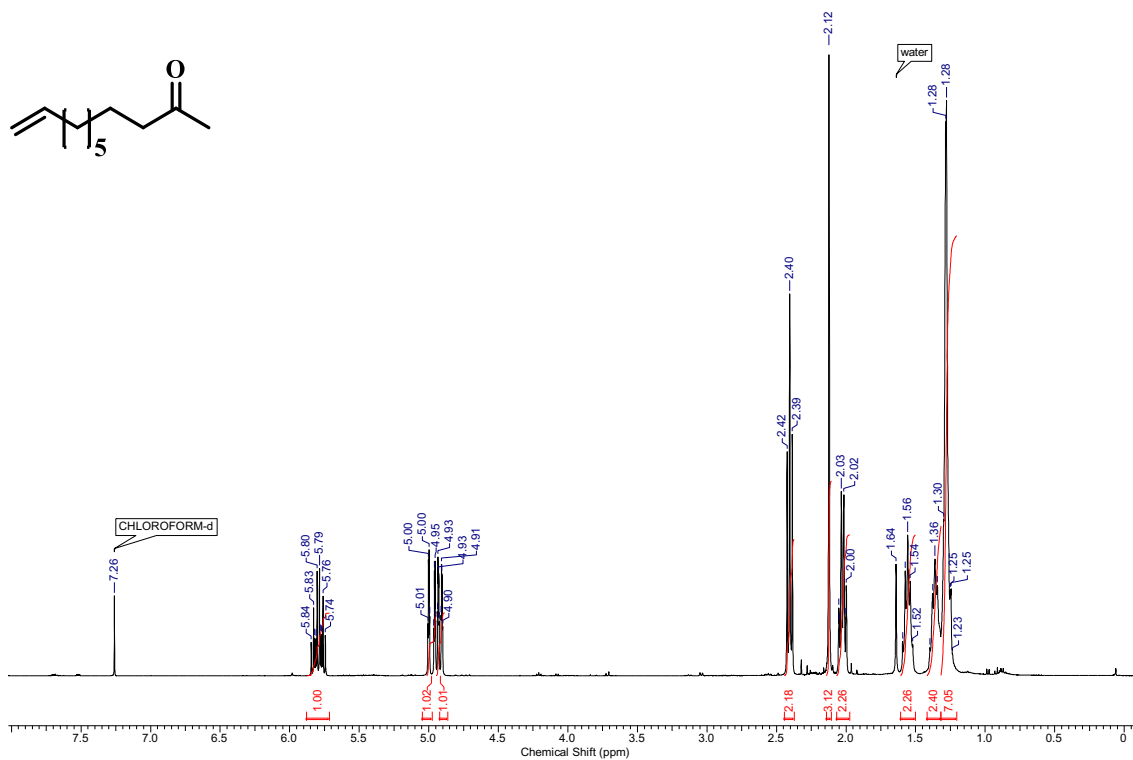

Figure S26. <sup>1</sup>H NMR spectra of compound **B** (CDCl<sub>3</sub>, 400 MHz)

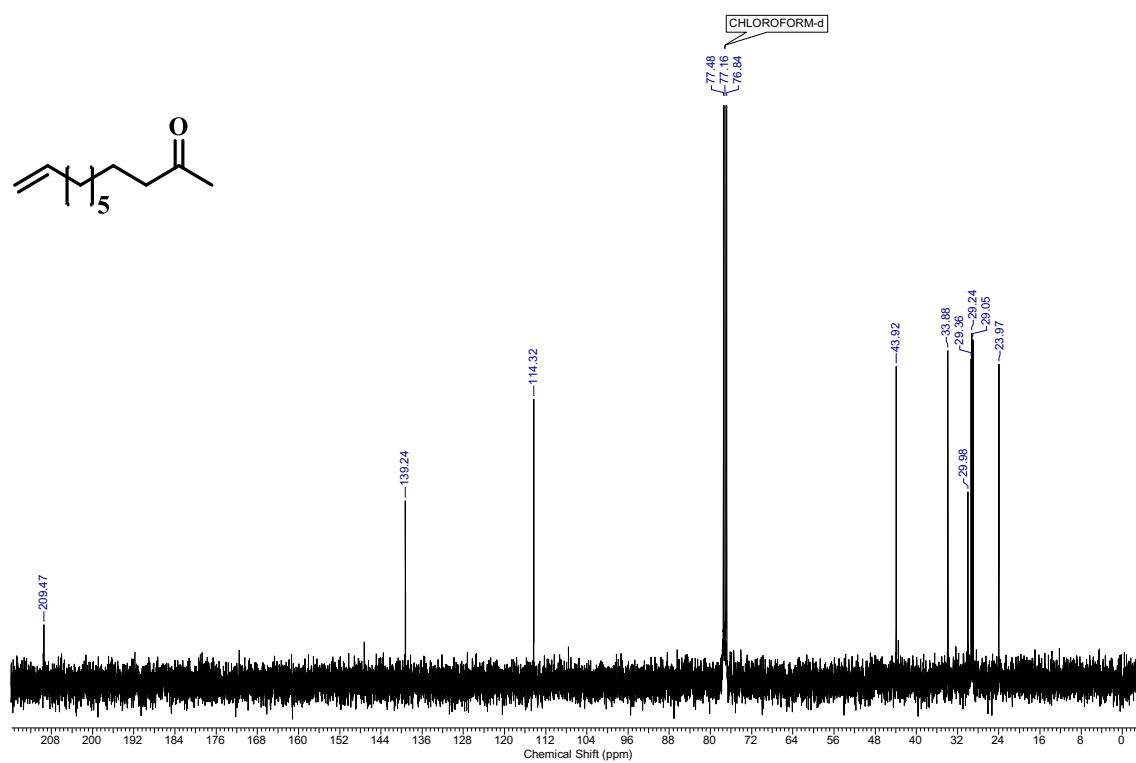

Figure S27. <sup>13</sup>C NMR spectra of compound **B** (CDCl<sub>3</sub>, 101 MHz).

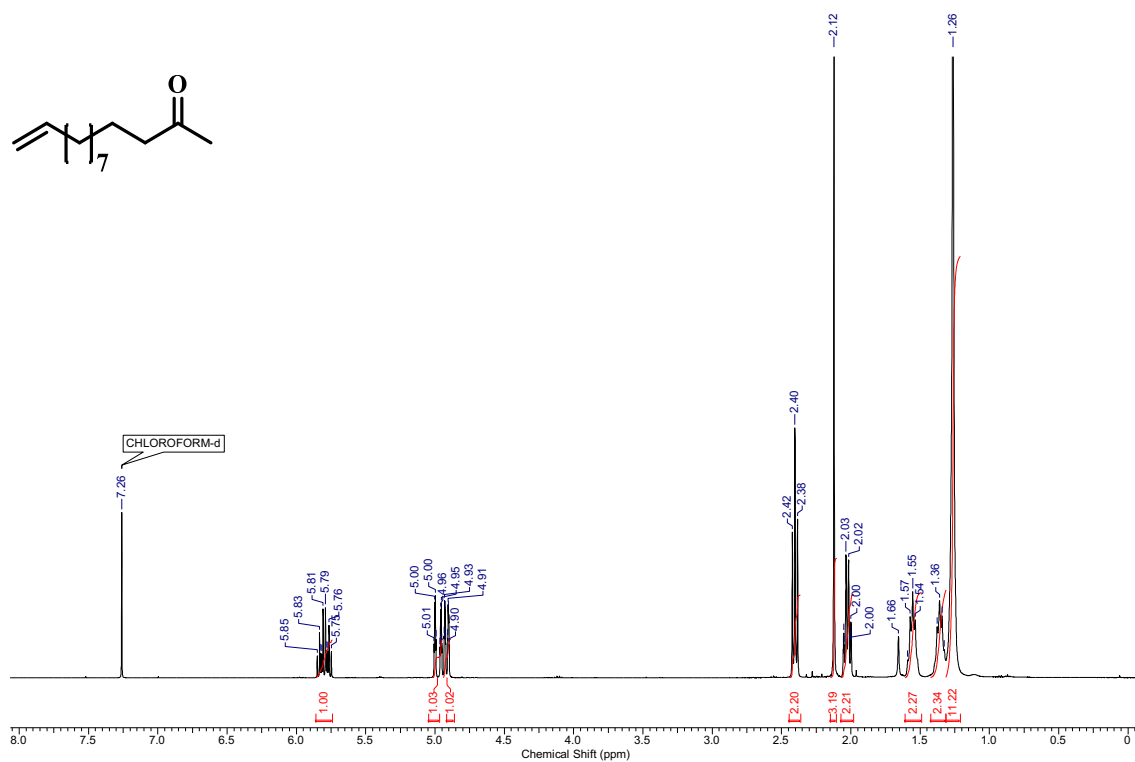

Figure S28. <sup>1</sup>H NMR spectra of compound C (CDCl<sub>3</sub>, 400 MHz)

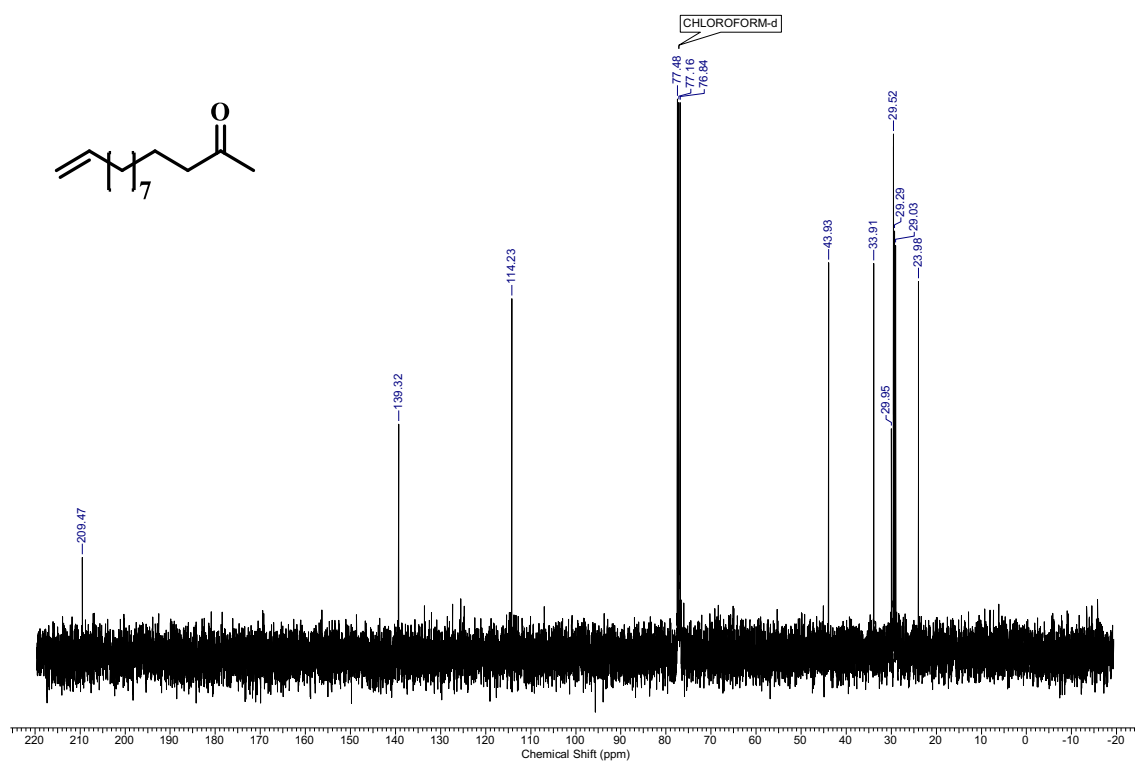

Figure S29. <sup>13</sup>C NMR spectra of compound C (CDCl<sub>3</sub>, 101 MHz).

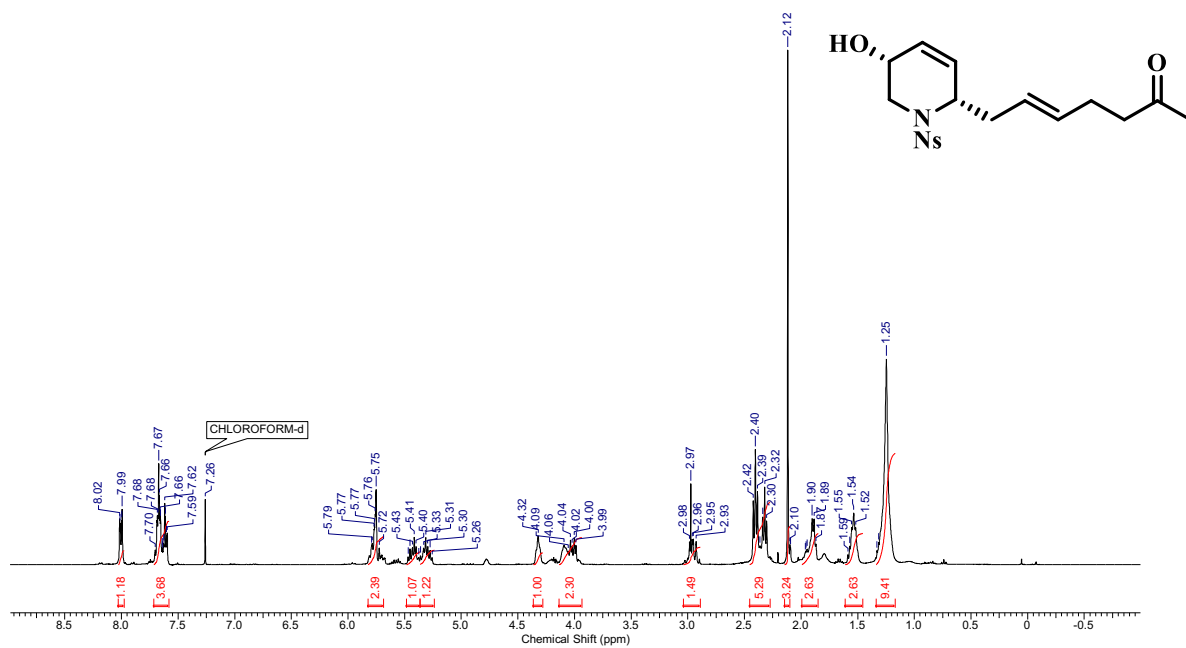

Figure S30. <sup>1</sup>H NMR spectra of compound **9a** (CDCl<sub>3</sub>, 400 MHz)

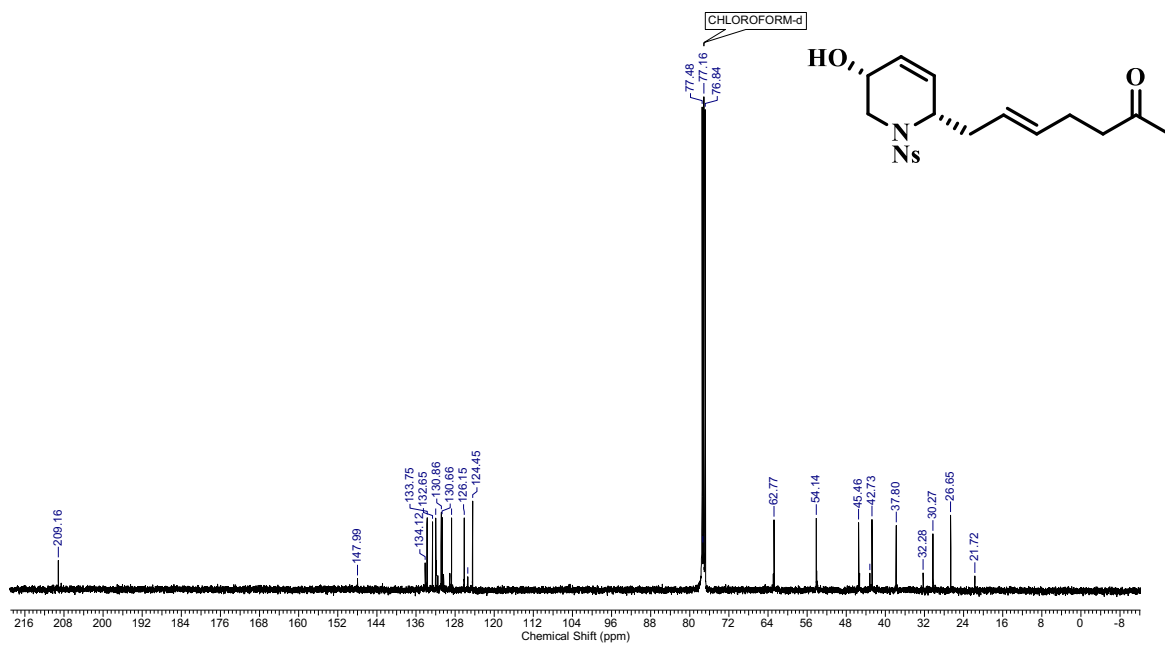

Figure S31. <sup>13</sup>C NMR spectra of compound **9a** (CDCl<sub>3</sub>, 101 MHz).

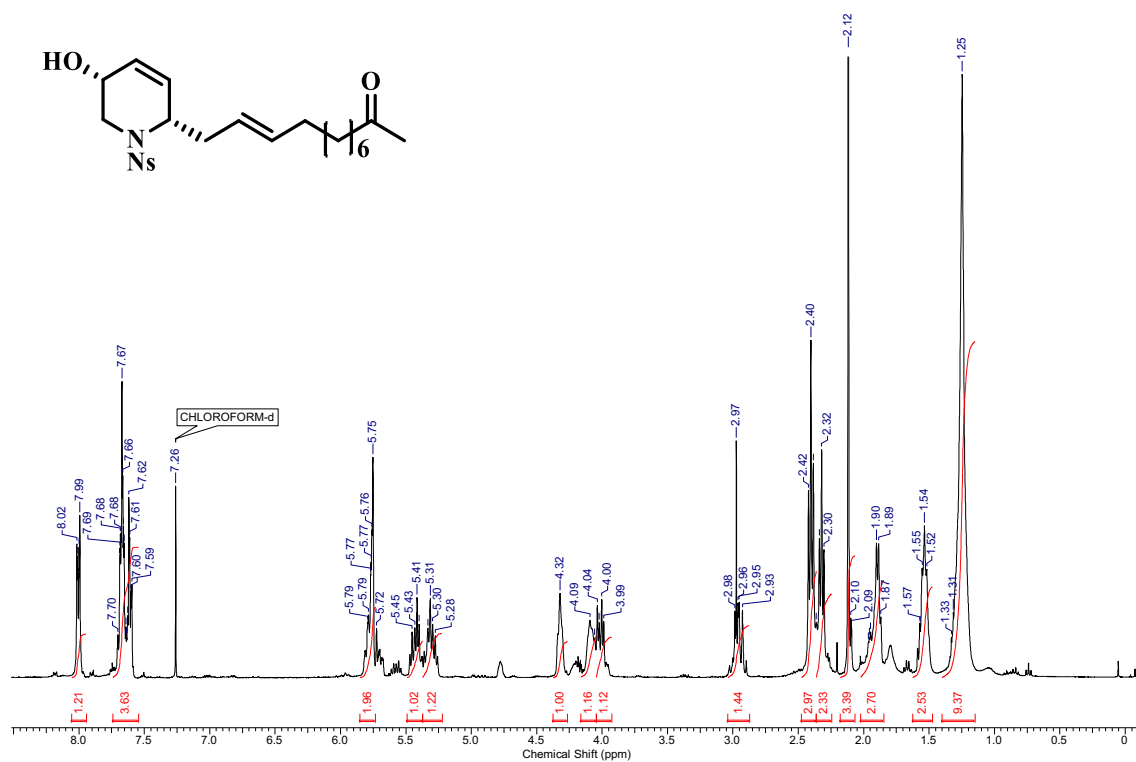

Figure S32. <sup>1</sup>H NMR spectra of compound **9b** (CDCl<sub>3</sub>, 400 MHz)

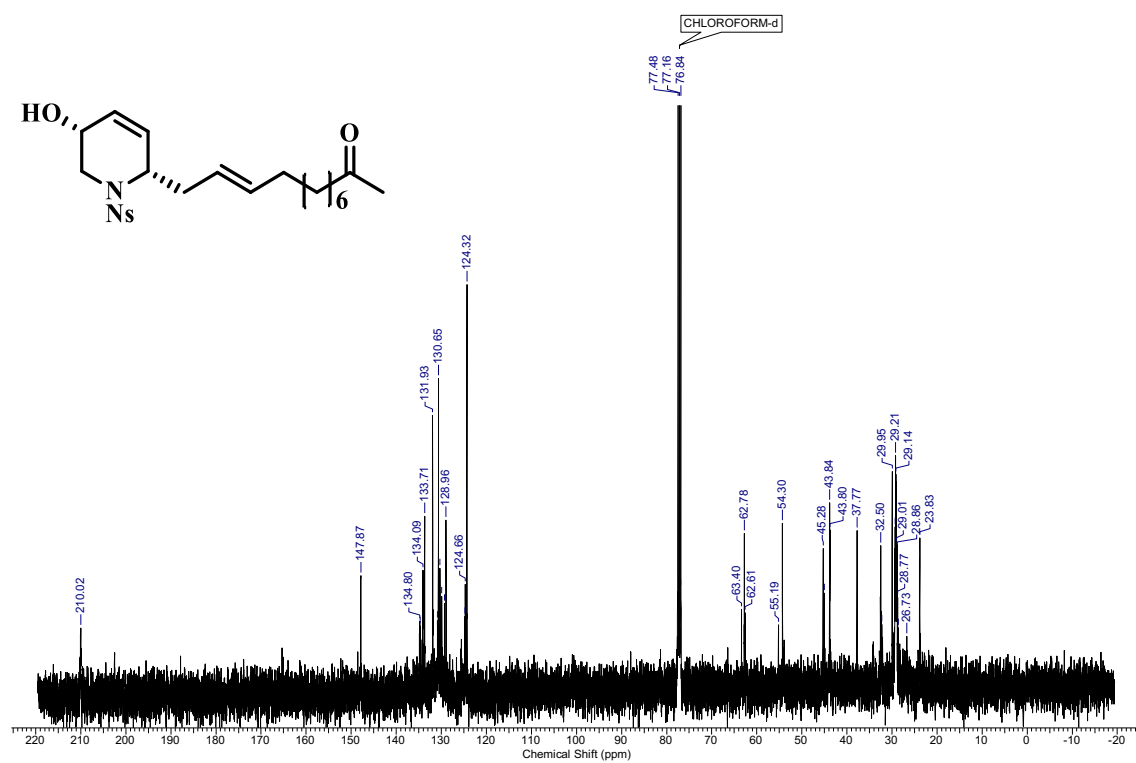

Figure S33. <sup>13</sup>C NMR spectra of compound **9b** (CDCl<sub>3</sub>, 101 MHz)

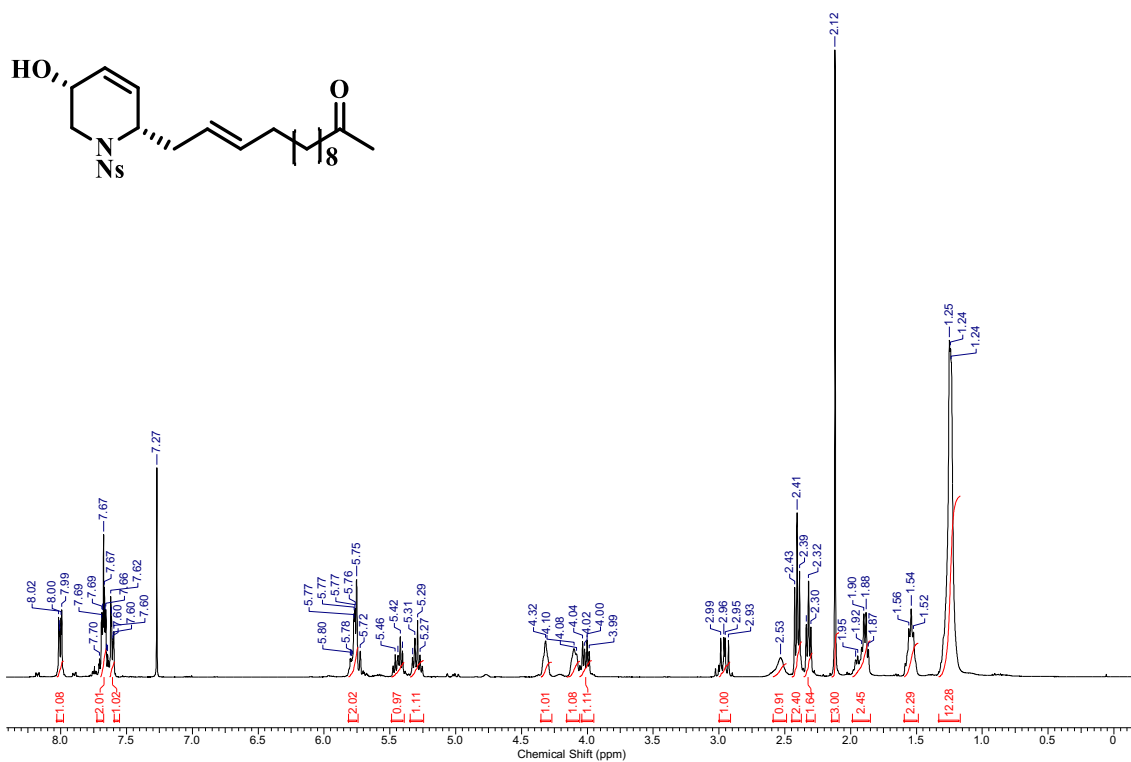

Figure S34. <sup>1</sup>H NMR spectra of compound **9c** (CDCl<sub>3</sub>, 400 MHz)

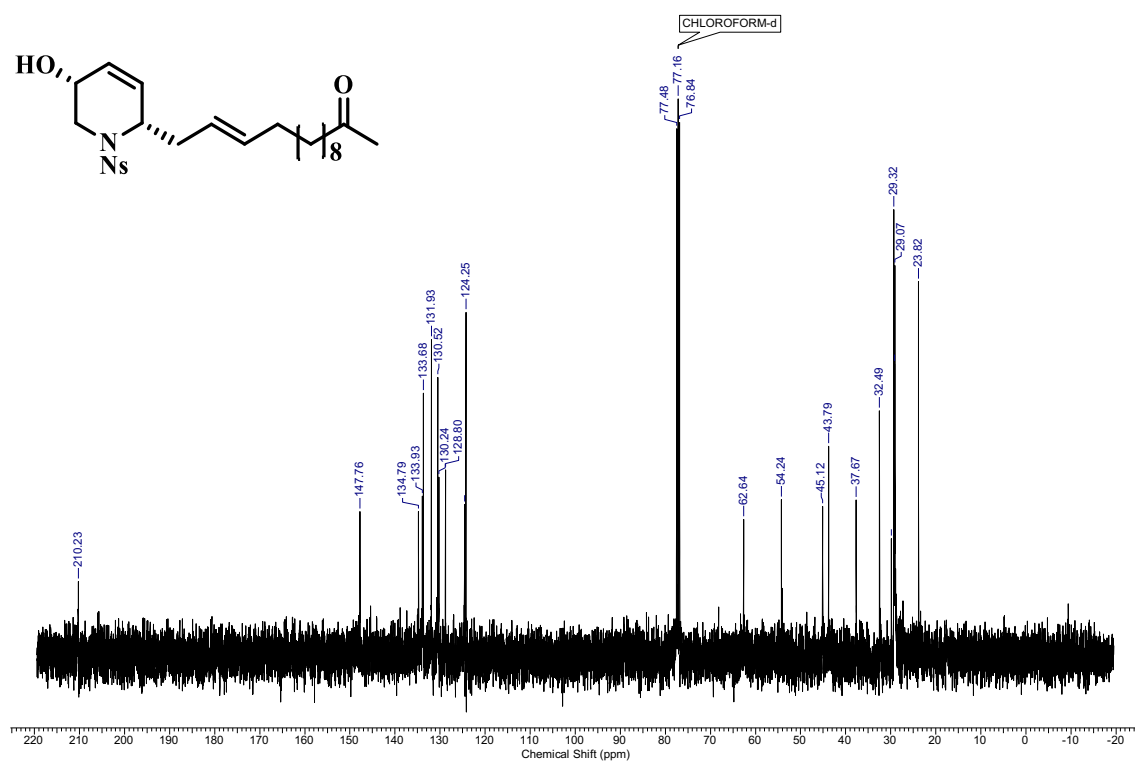

Figure S35. <sup>13</sup>C NMR spectra of compound **9c** (CDCl<sub>3</sub>, 101 MHz)

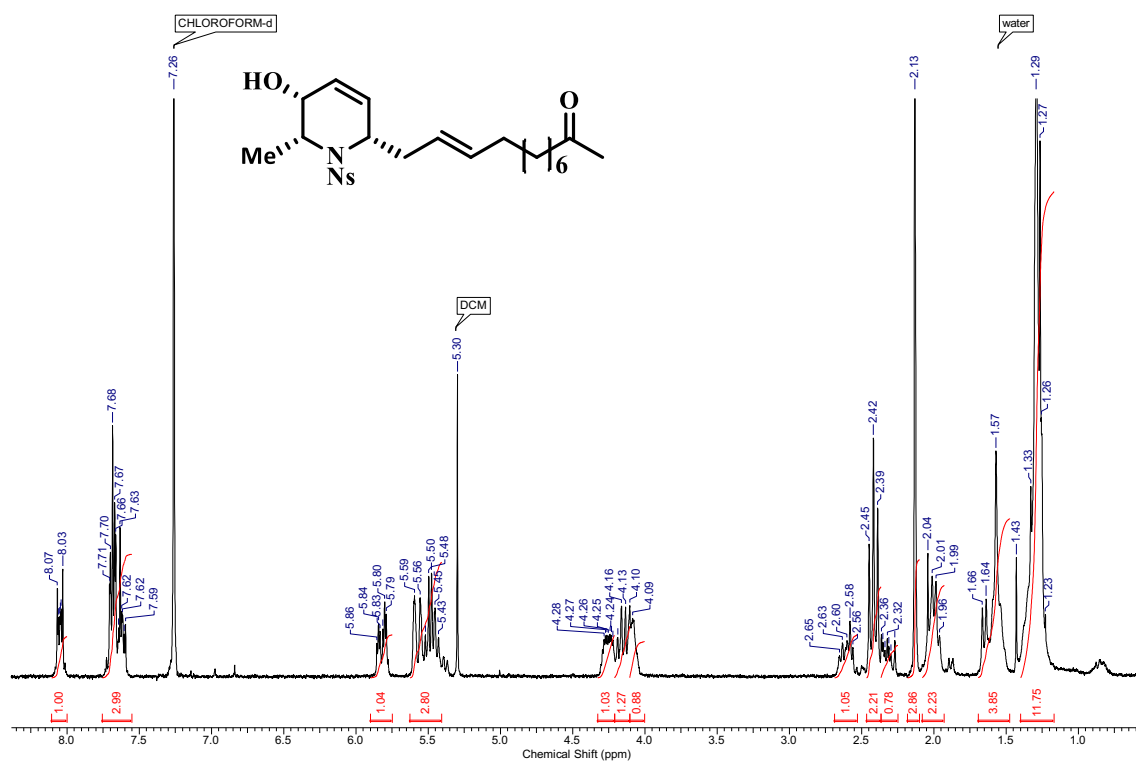

Figure S36. <sup>1</sup>H NMR spectra of compound **9d** (CDCl<sub>3</sub>, 250 MHz)

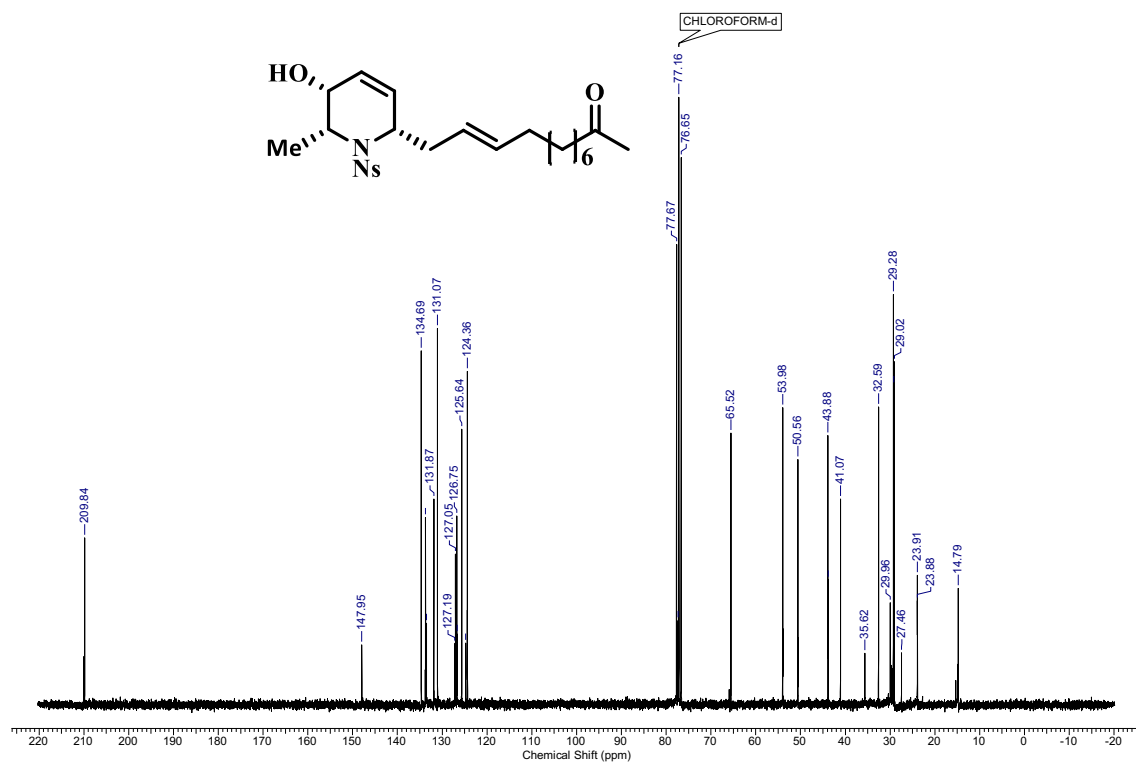

Figure S37. <sup>13</sup>C NMR spectra of compound **9d** (CDCl<sub>3</sub>, 63 MHz)

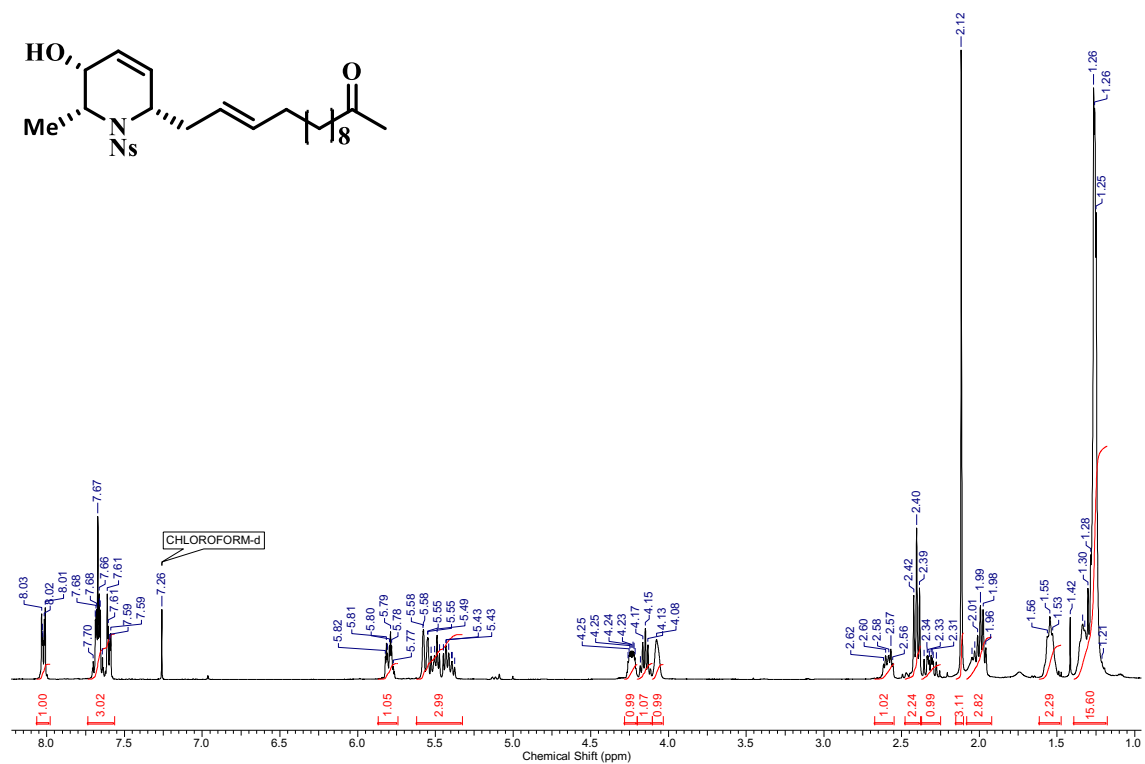

Figure S38. <sup>1</sup>H NMR spectra of compound **9e** (CDCl<sub>3</sub>, 400 MHz)

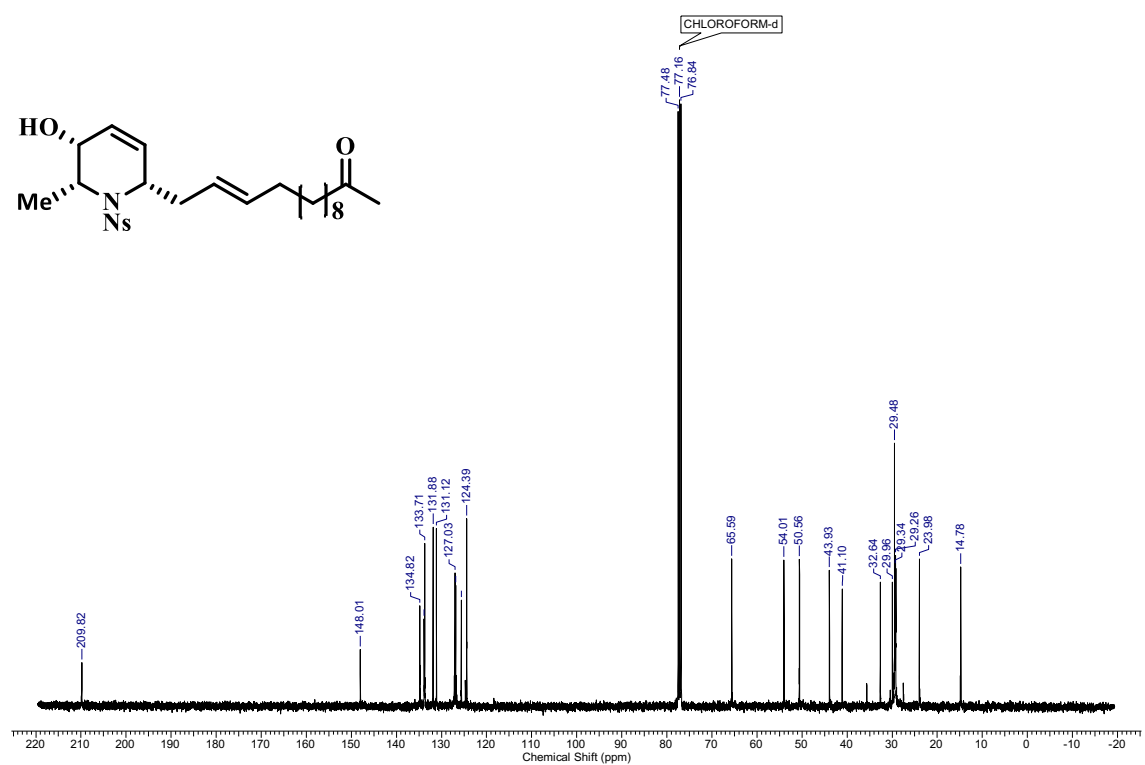

Figure S39. <sup>13</sup>C NMR spectra of compound **9e** (CDCl<sub>3</sub>, 101 MHz)

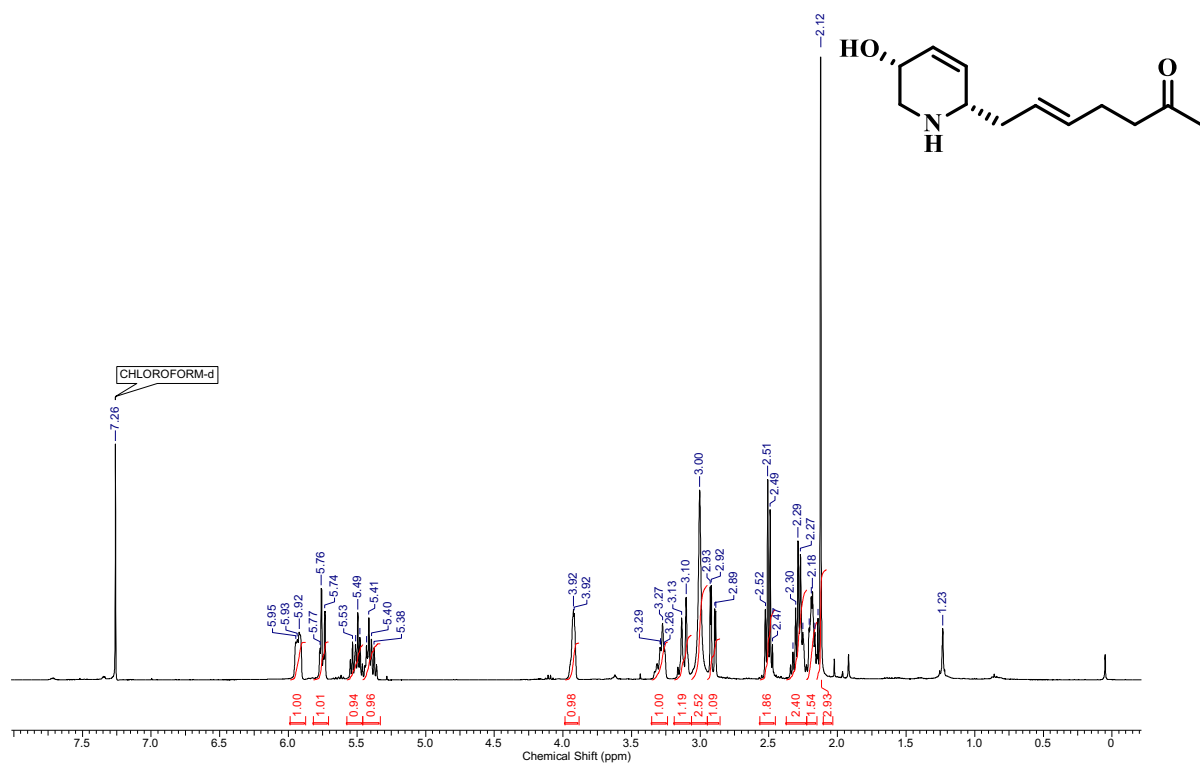

Figure S40. <sup>1</sup>H NMR spectra of compound **10a** (CDCl<sub>3</sub>, 400 MHz)

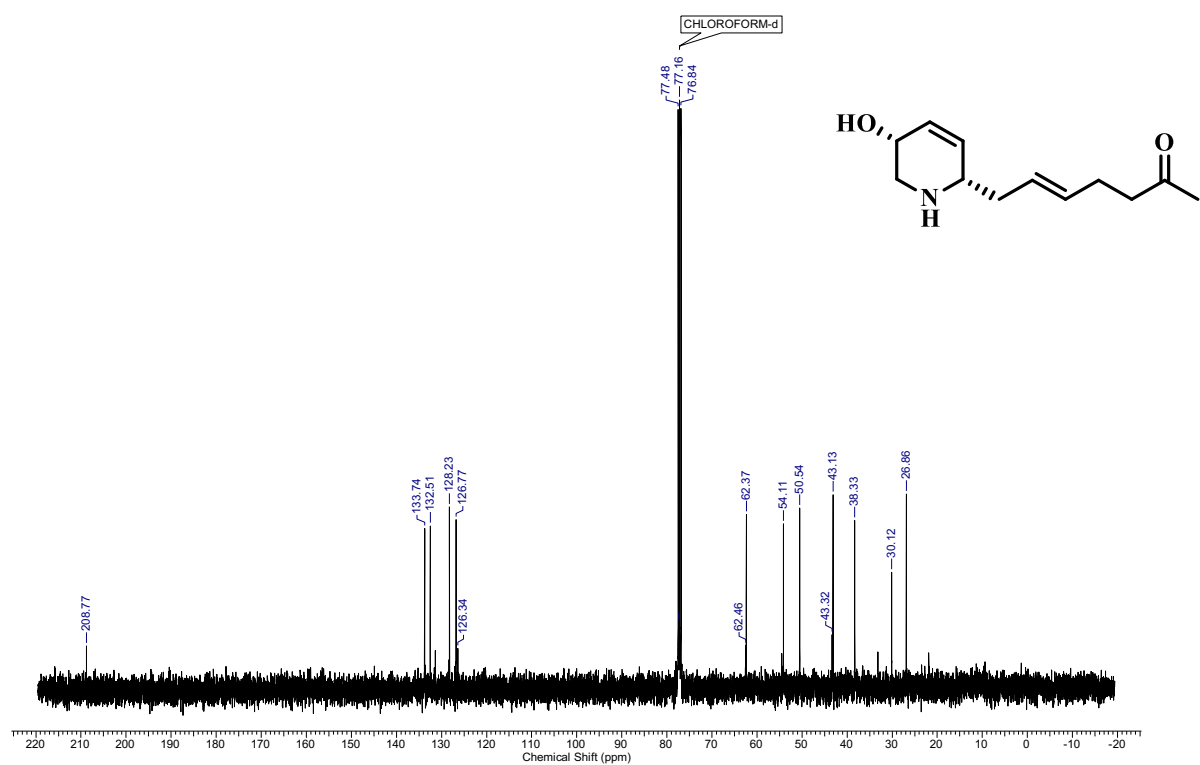

Figure S41. <sup>13</sup>C NMR spectra of compound **10a** (CDCl<sub>3</sub>, 101 MHz)



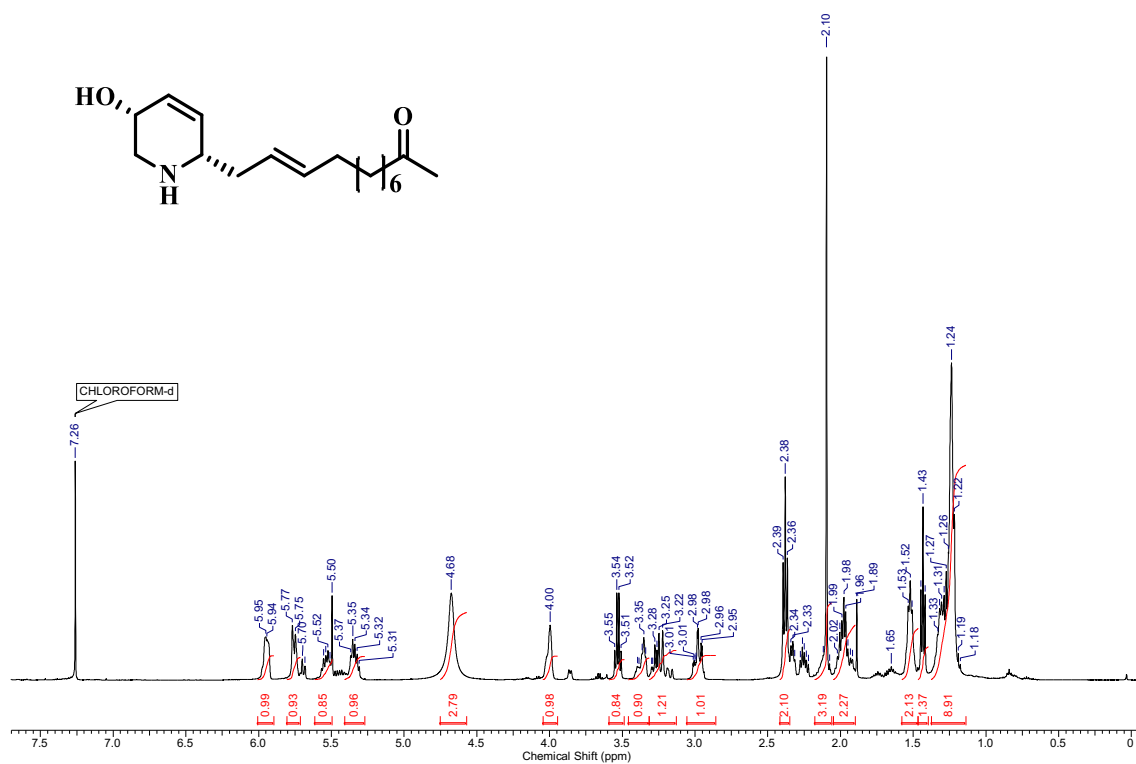

Figure S42. <sup>1</sup>H NMR spectra of compound **10b** (CDCl<sub>3</sub>, 500 MHz)

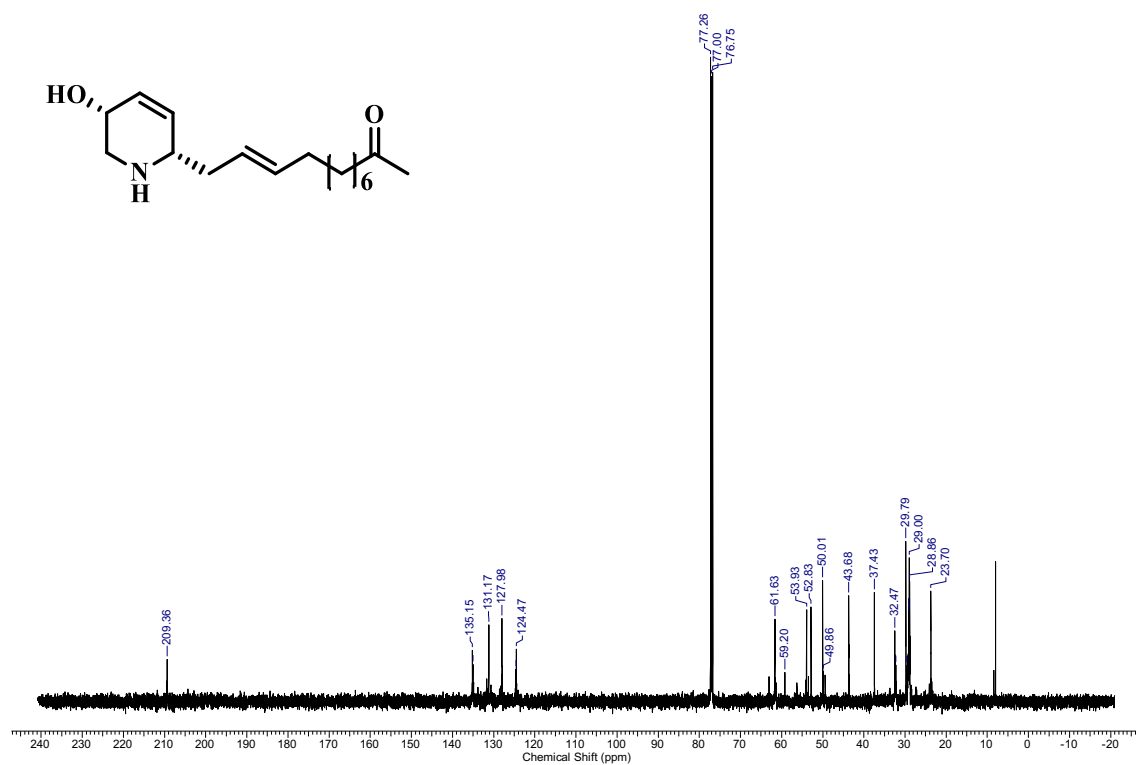

Figure S43. <sup>13</sup>C NMR spectra of compound **10b** (CDCl<sub>3</sub>, 126 MHz)

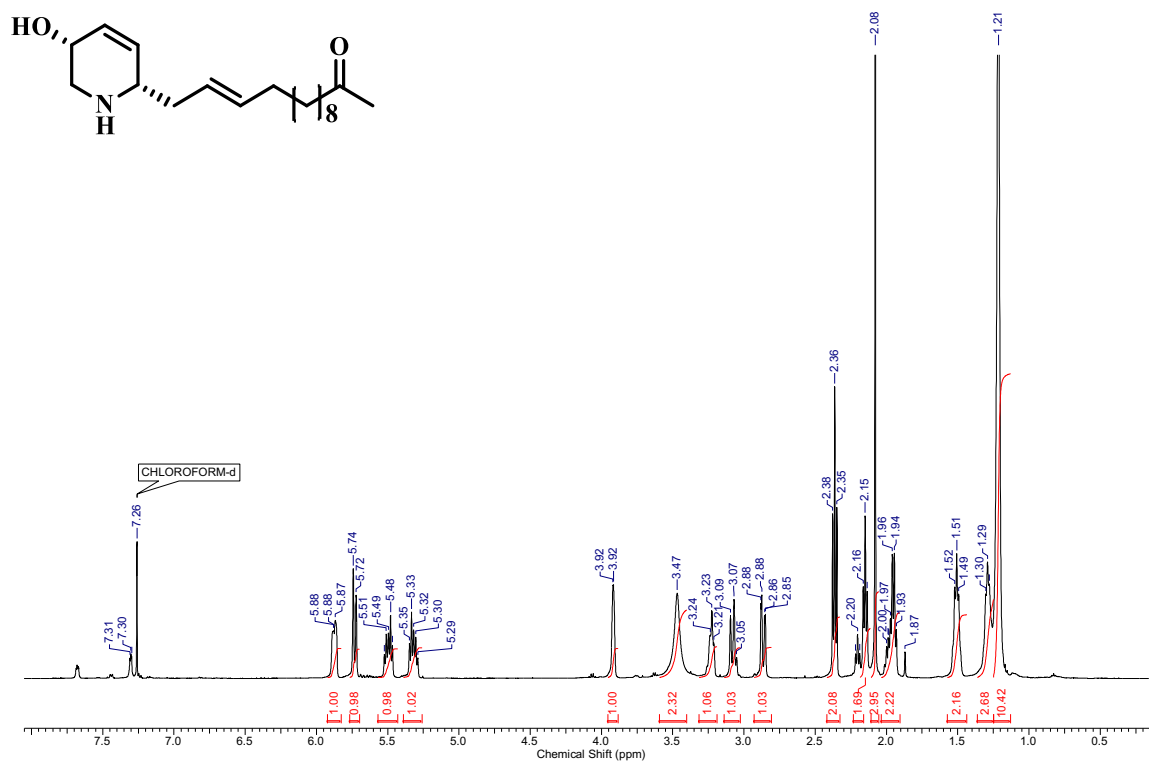

Figure S44. <sup>1</sup>H NMR spectra of compound **10c** (CDCl<sub>3</sub>, 500 MHz)

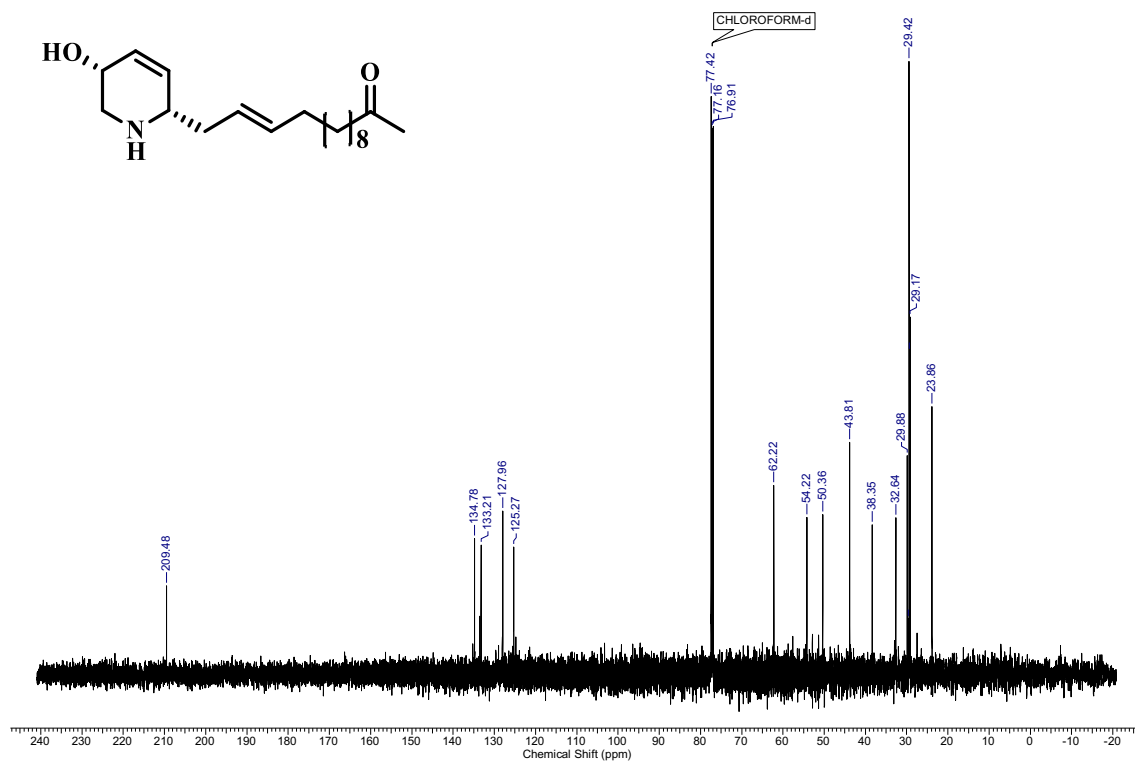

Figure S45. <sup>13</sup>C NMR spectra of compound **10c** (CDCl<sub>3</sub>, 126 MHz)

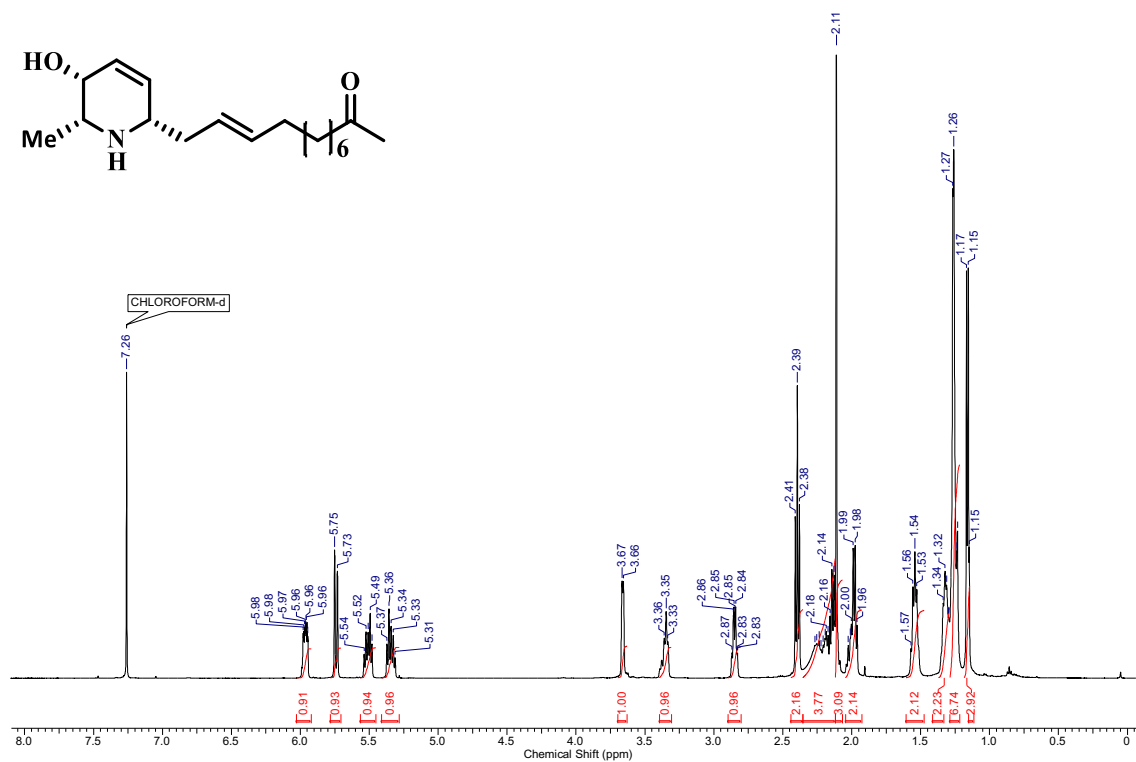

Figure S46. <sup>1</sup>H NMR spectra of compound **10d** (CDCl<sub>3</sub>, 500 MHz)

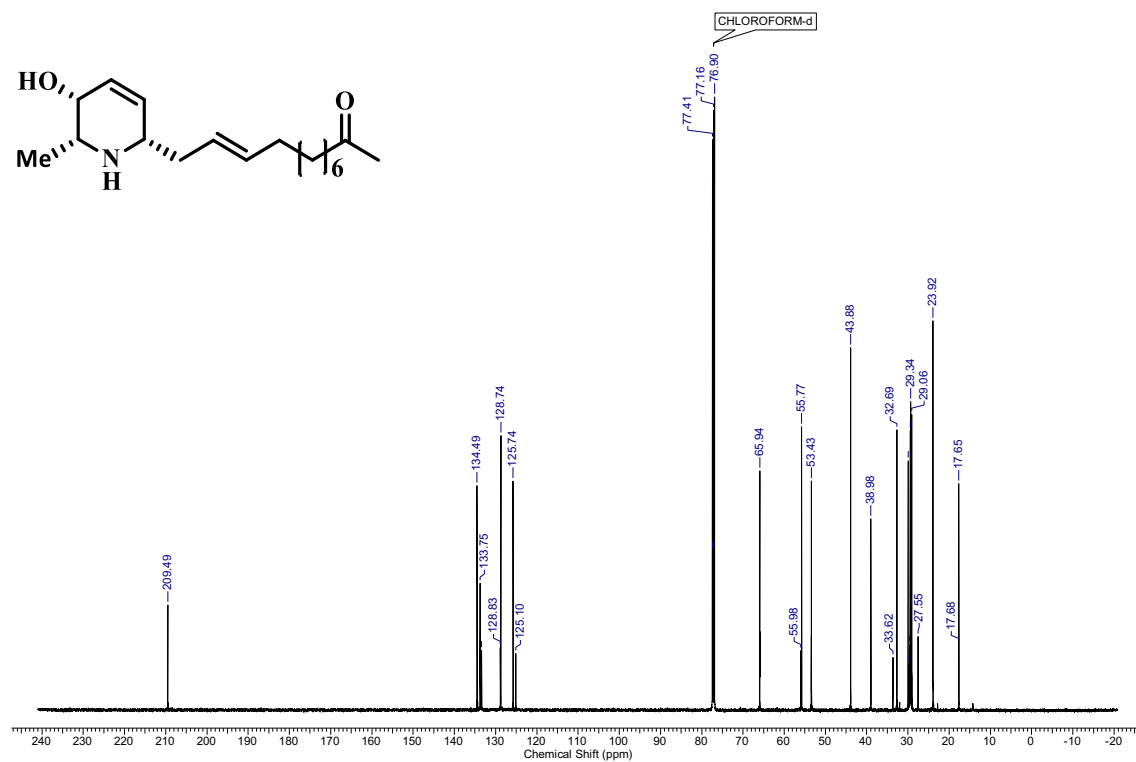

Figure S47. <sup>13</sup>C NMR spectra of compound **10d** (CDCl<sub>3</sub>, 126 MHz)

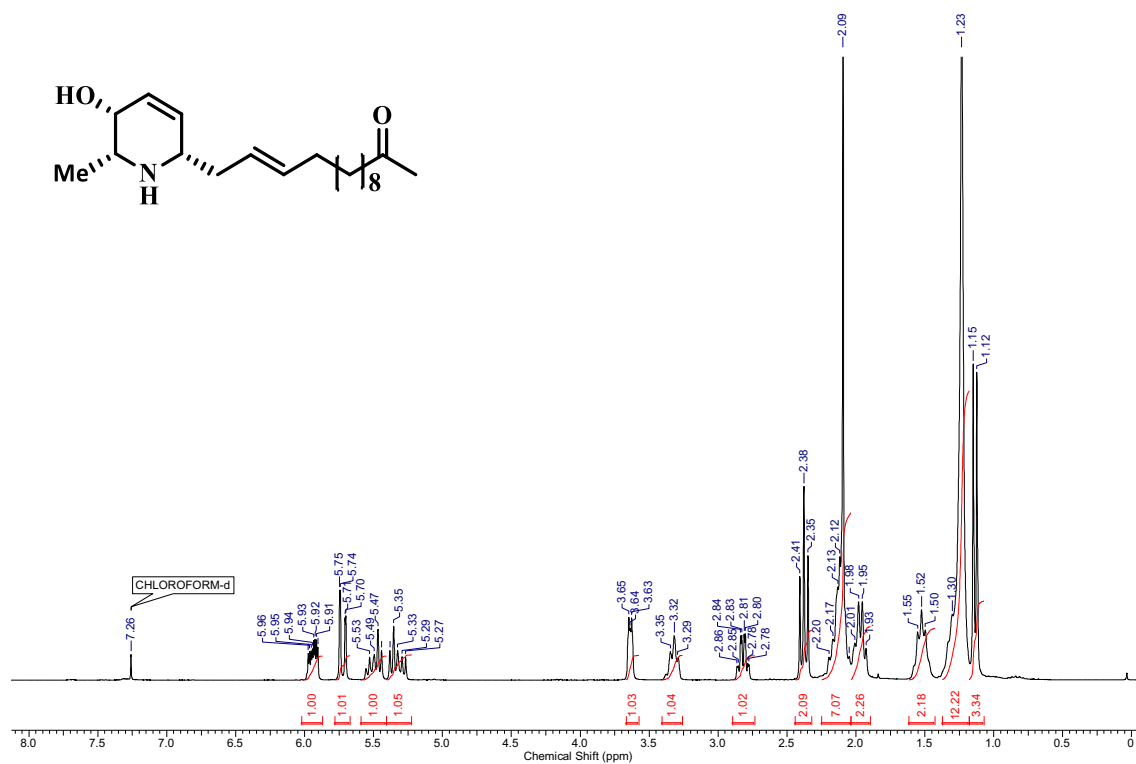

Figure S48. <sup>1</sup>H NMR spectra of compound **10e** (CDCl<sub>3</sub>, 250 MHz)

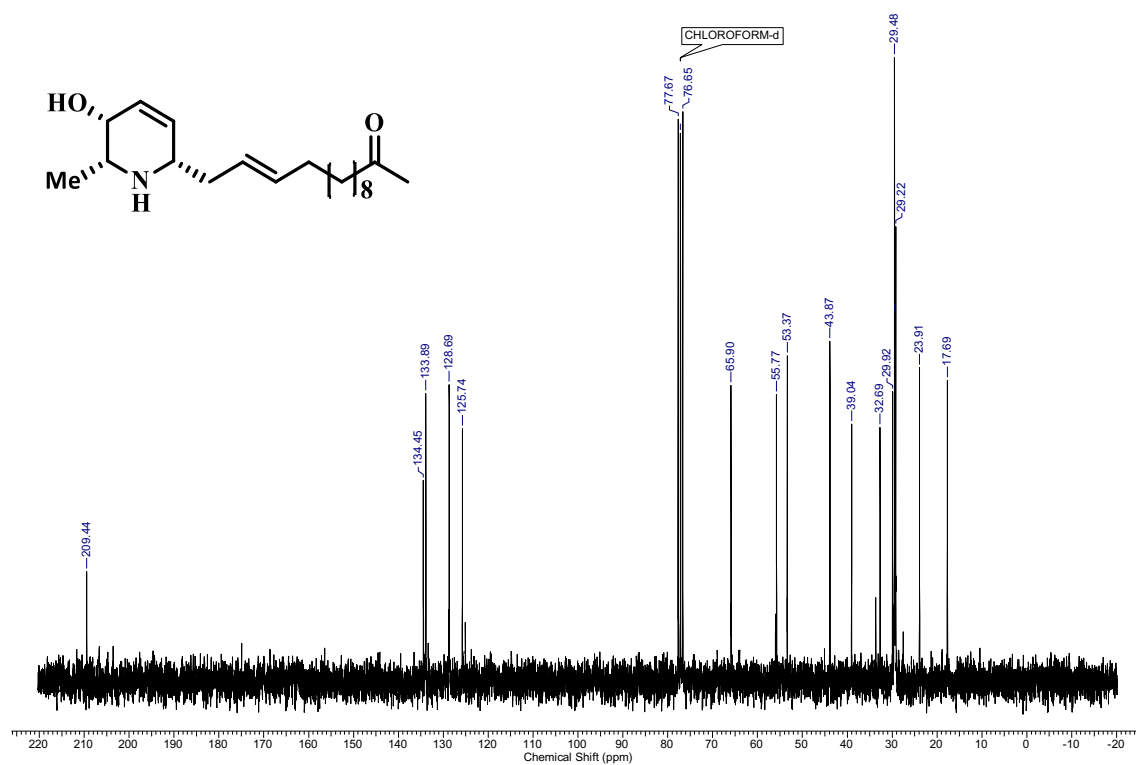

Figure S49. <sup>13</sup>C NMR spectra of compound **10e** (CDCl<sub>3</sub>, 63 MHz)

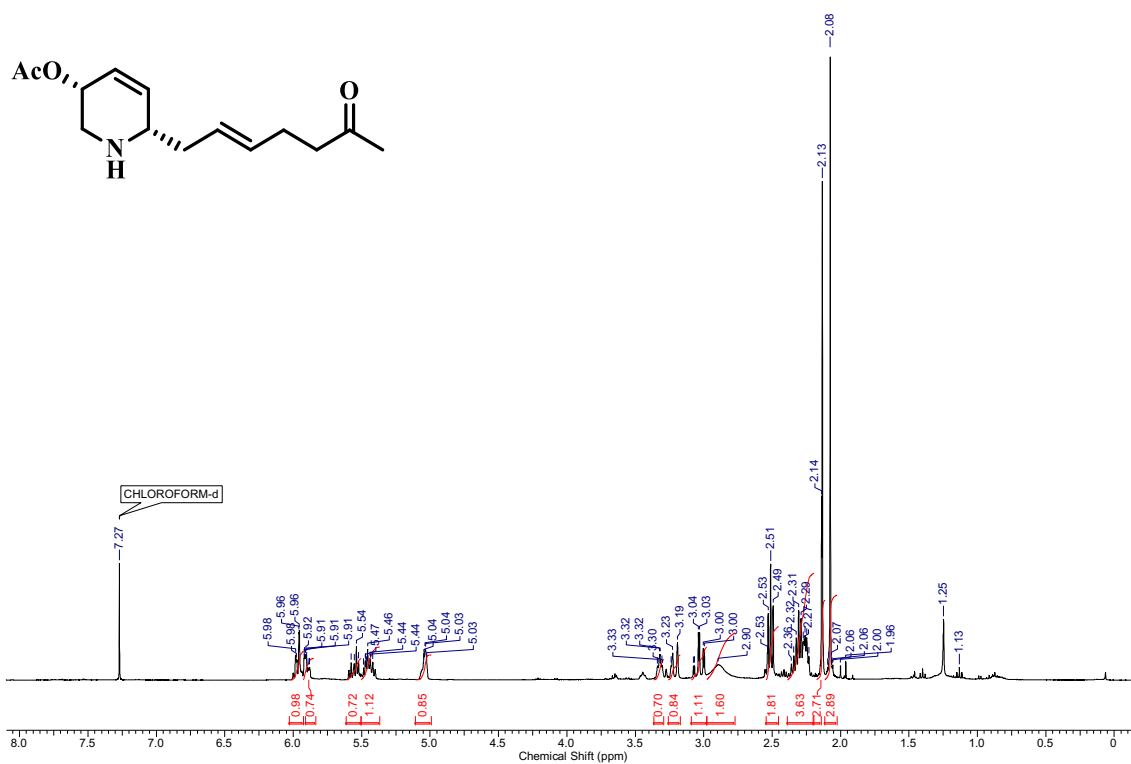

Figure S50. <sup>1</sup>H NMR spectra of compound **11a** (CDCl<sub>3</sub>, 400 MHz)

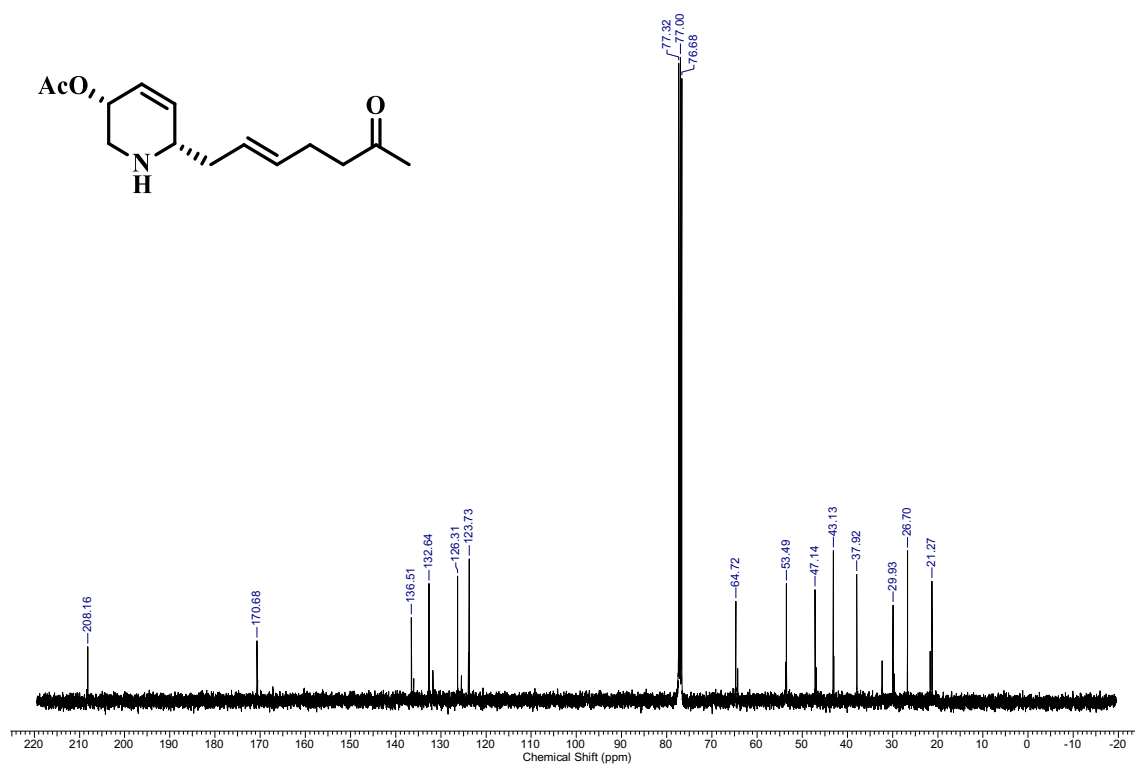

Figure S51. <sup>13</sup>C NMR spectra of compound **11a** (CDCl<sub>3</sub>, 101 MHz)

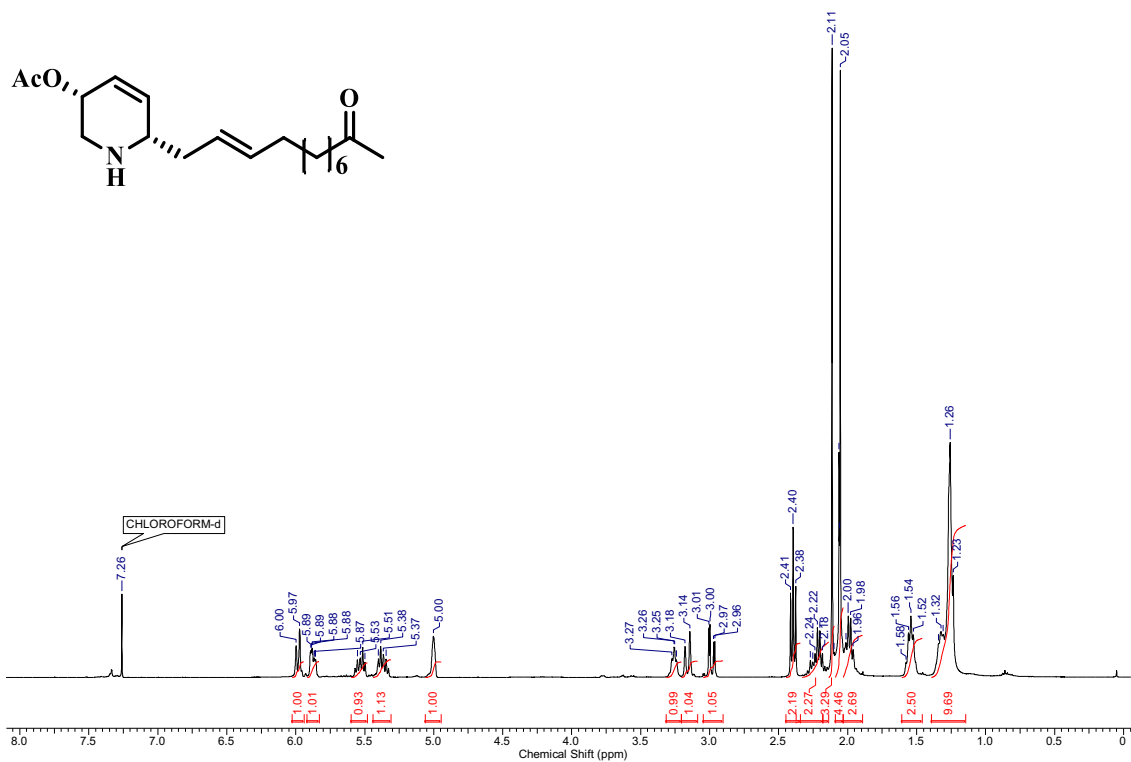

Figure S52.  $^1\text{H}$  NMR spectra of compound **11b** ( $\text{CDCl}_3$ , 400 MHz)

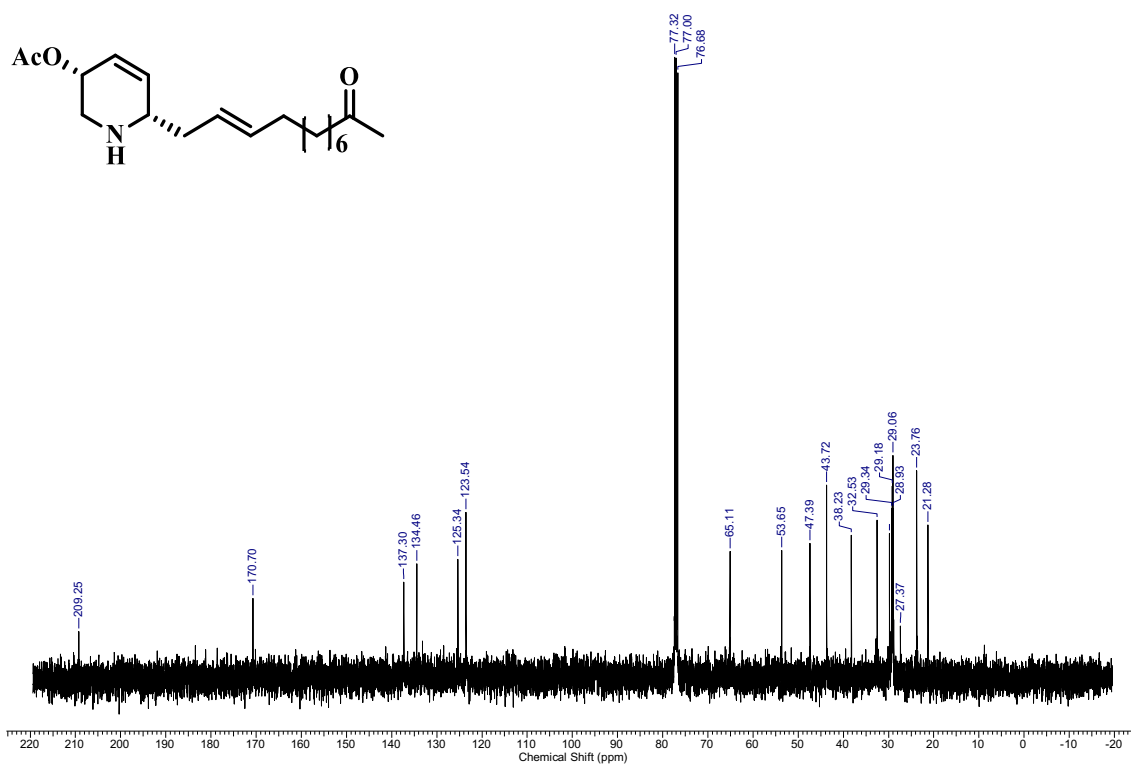

Figure S53.  $^{13}\text{C}$  NMR spectra of compound **11b** ( $\text{CDCl}_3$ , 101 MHz)

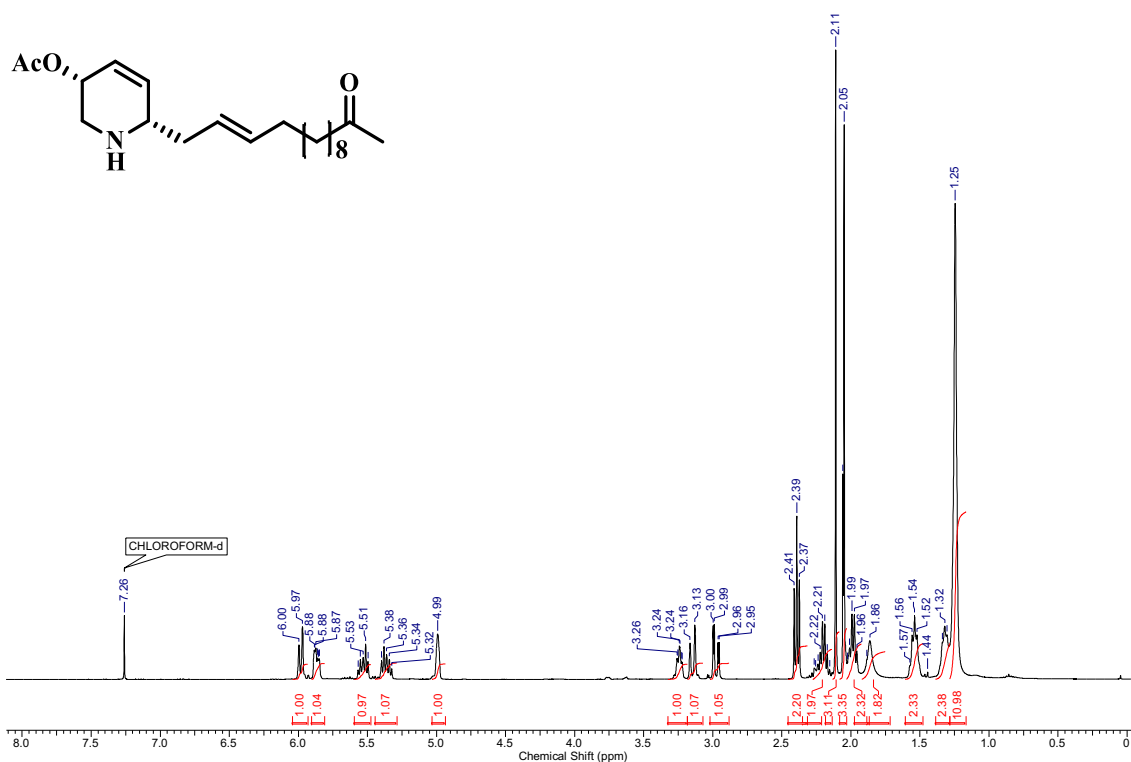

Figure S54. <sup>1</sup>H NMR spectra of compound **11c** (CDCl<sub>3</sub>, 400 MHz)

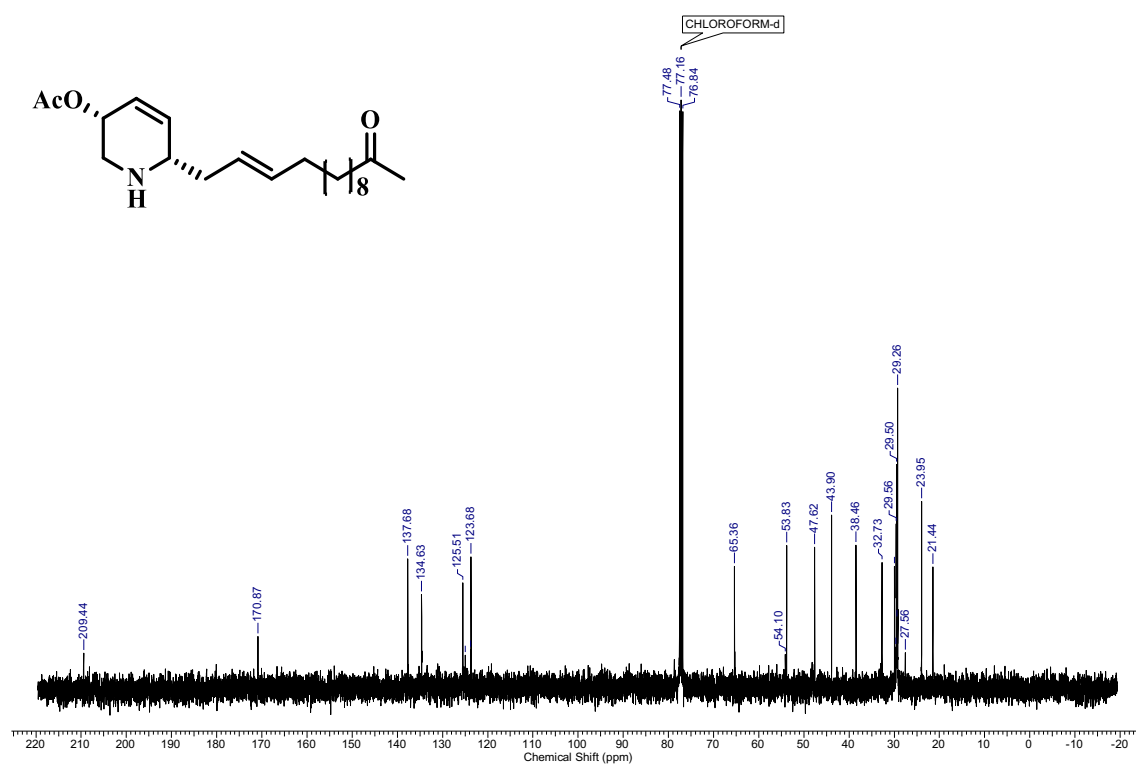

Figure S55. <sup>13</sup>C NMR spectra of compound **11c** (CDCl<sub>3</sub>, 101 MHz)

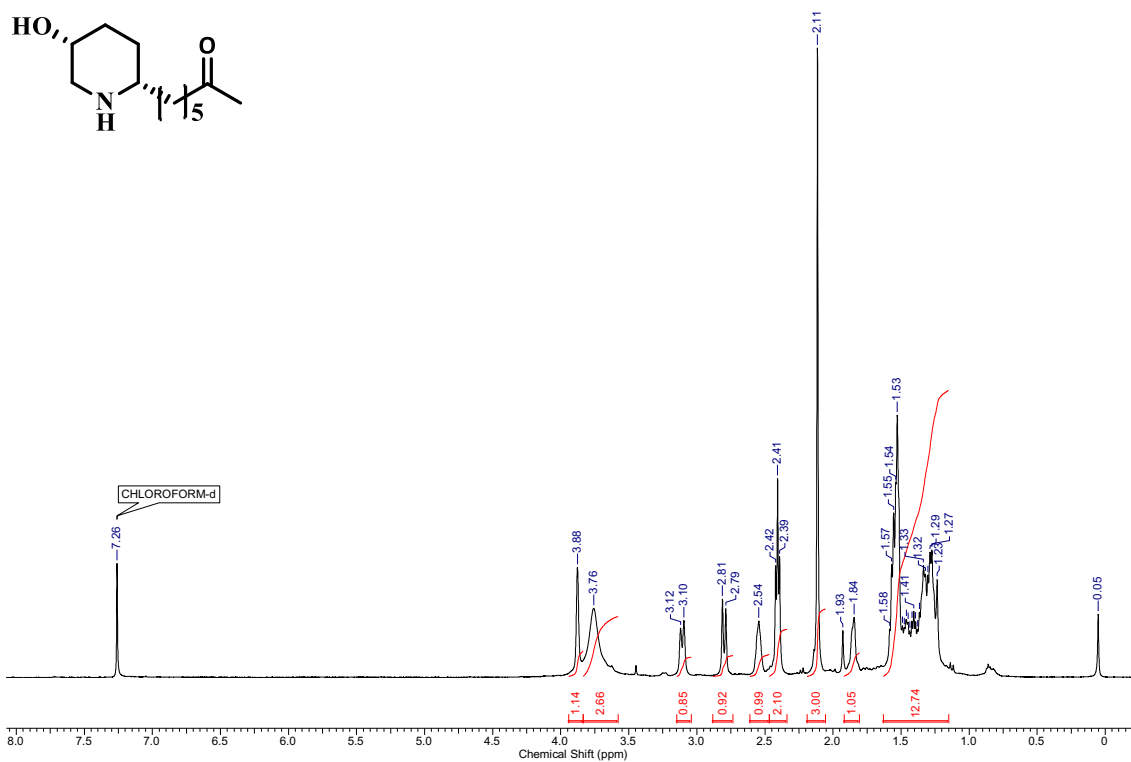

Figure S56. <sup>1</sup>H NMR spectra of compound **12a** (CDCl<sub>3</sub>, 500 MHz)

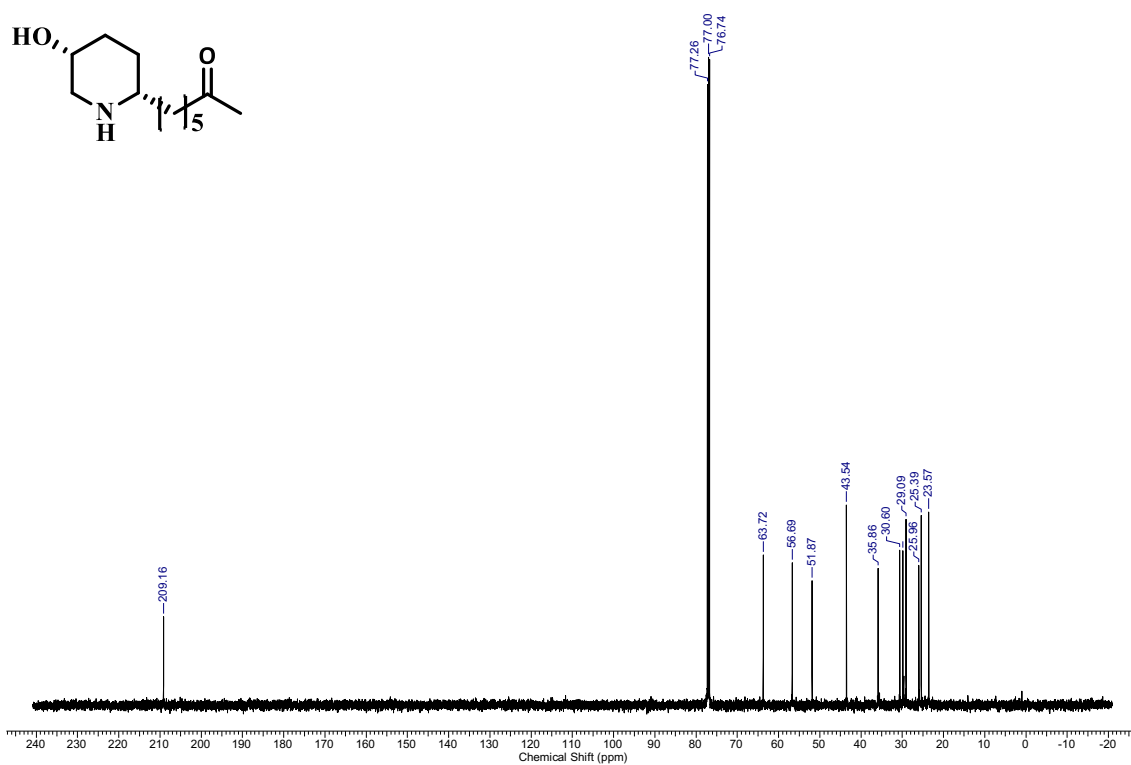

Figure S57. <sup>13</sup>C NMR spectra of compound **12a** (CDCl<sub>3</sub>, 126 MHz)



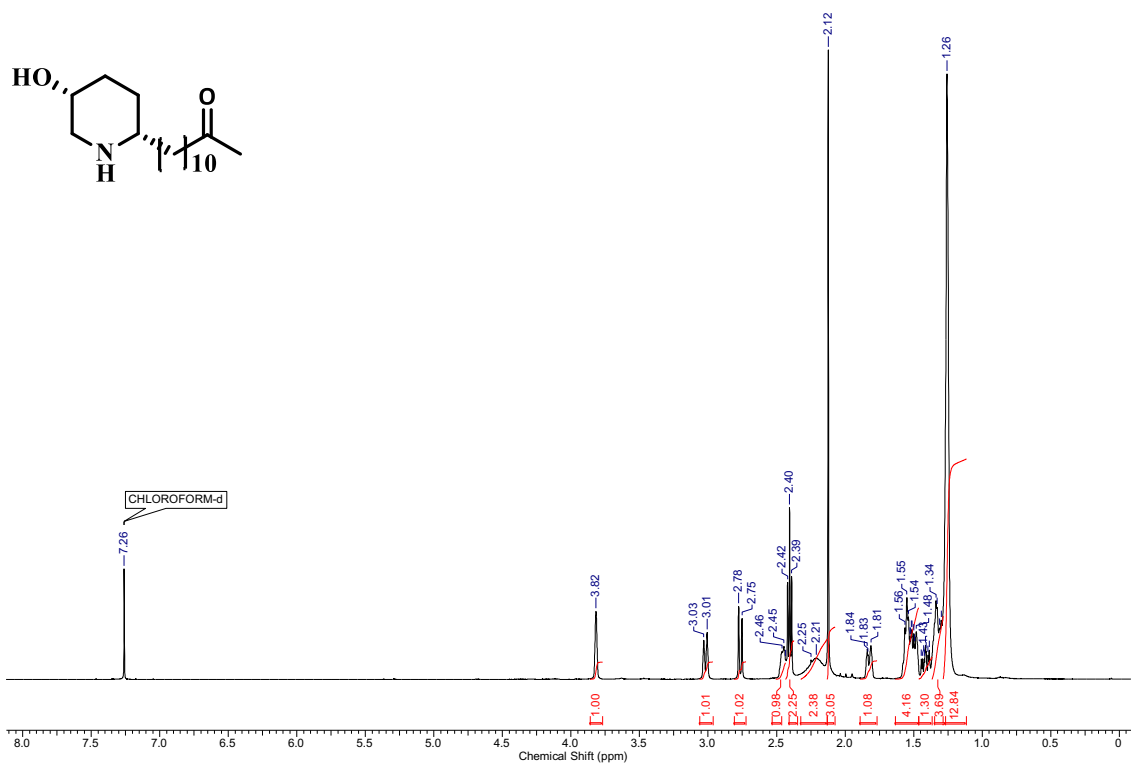

Figure S58.  $^1\text{H}$  NMR spectra of compound **12b** ( $\text{CDCl}_3$ , 500 MHz)

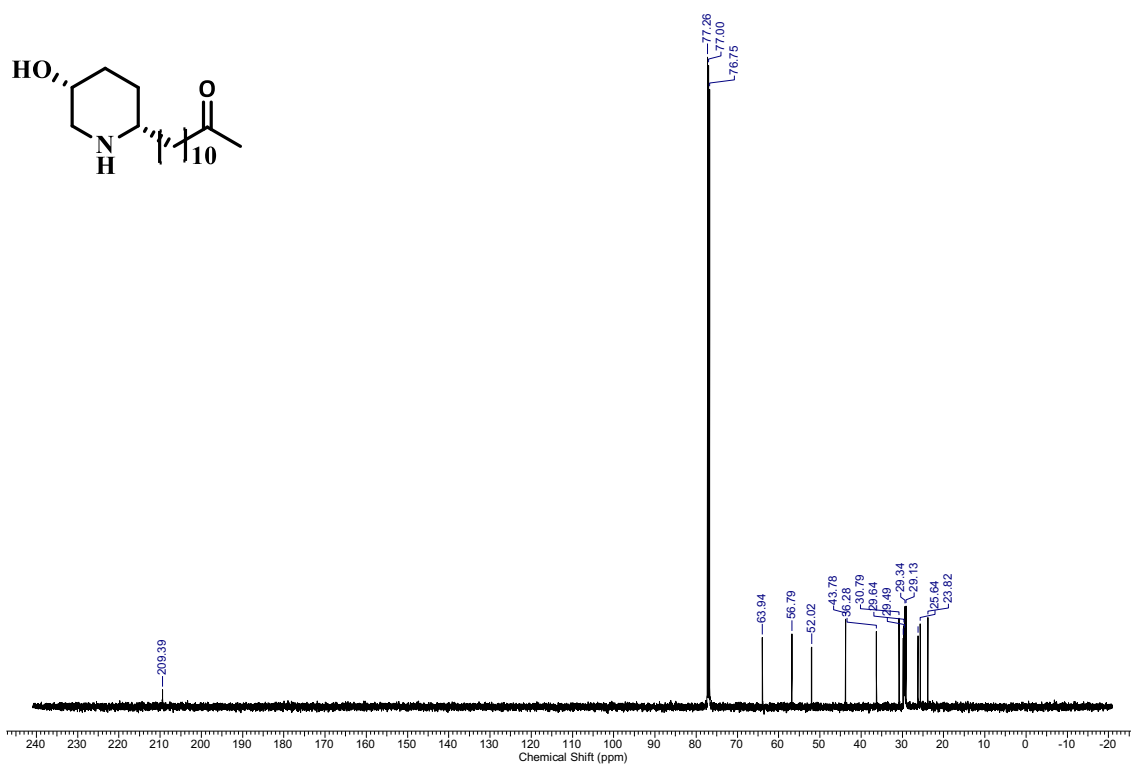

Figure S59.  $^{13}\text{C}$  NMR spectra of compound **12b** ( $\text{CDCl}_3$ , 126 MHz)

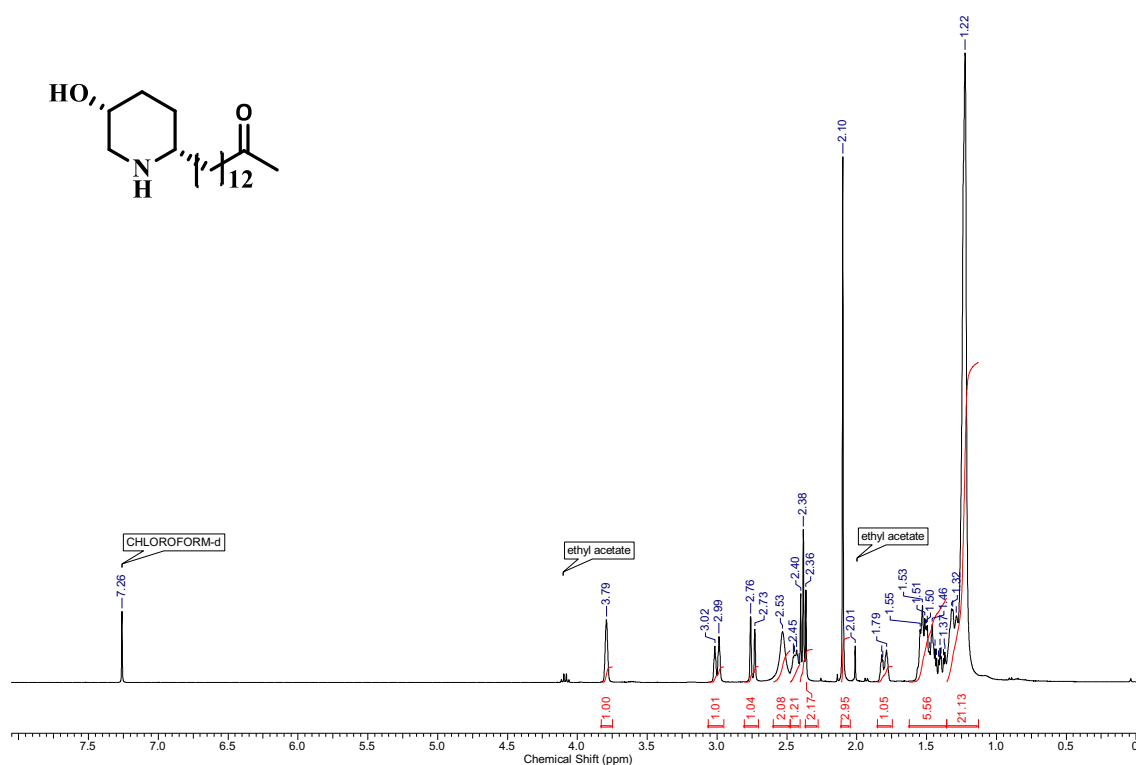

Figure S60. <sup>1</sup>H NMR spectra of compound **12c** (CDCl<sub>3</sub>, 400 MHz)

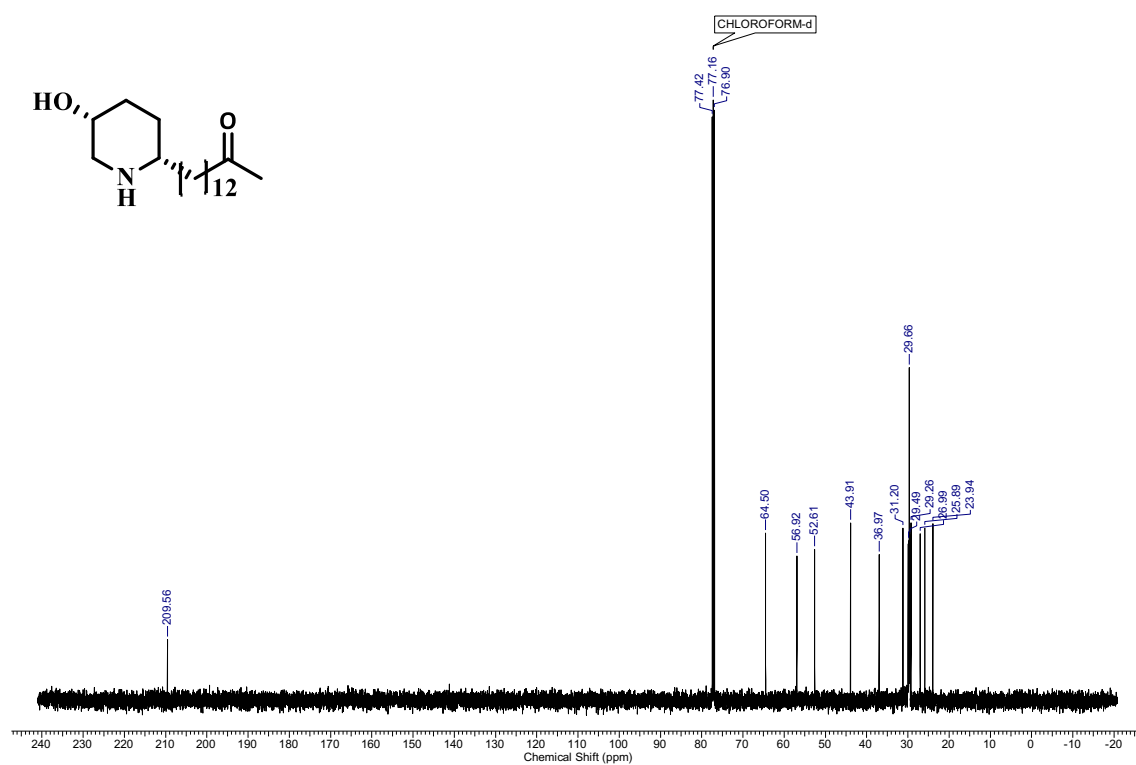

Figure S61. <sup>13</sup>C NMR spectra of compound **12c** (CDCl<sub>3</sub>, 101 MHz)

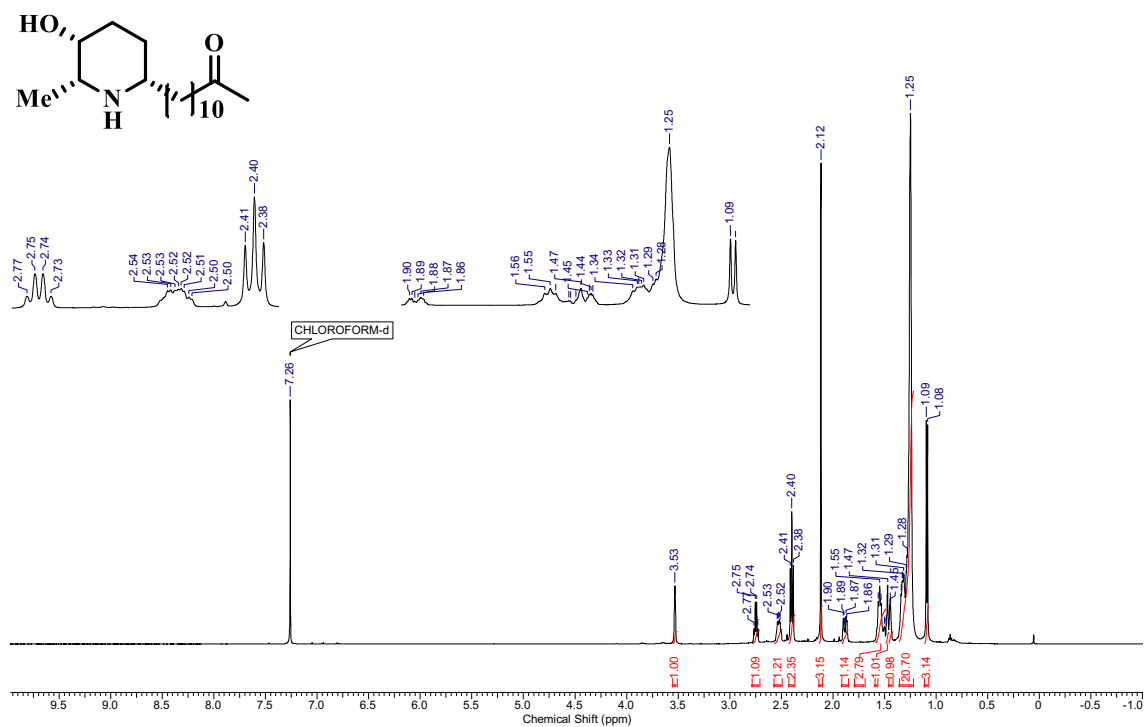

Figure S62. <sup>1</sup>H NMR spectra of compound **1** ( $\pm$ -cassine) (CDCl<sub>3</sub>, 500 MHz)

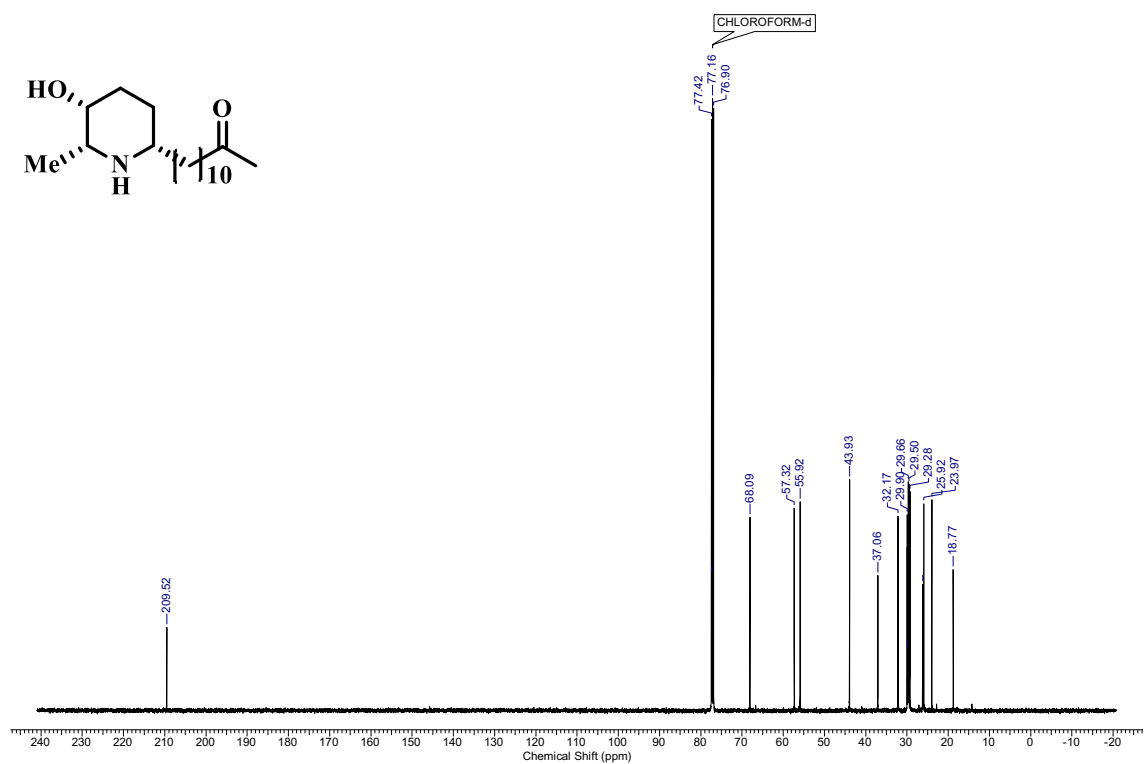

Figure S63. <sup>13</sup>C NMR spectra of compound **1** ( $\pm$ -cassine) (CDCl<sub>3</sub>, 126 MHz)

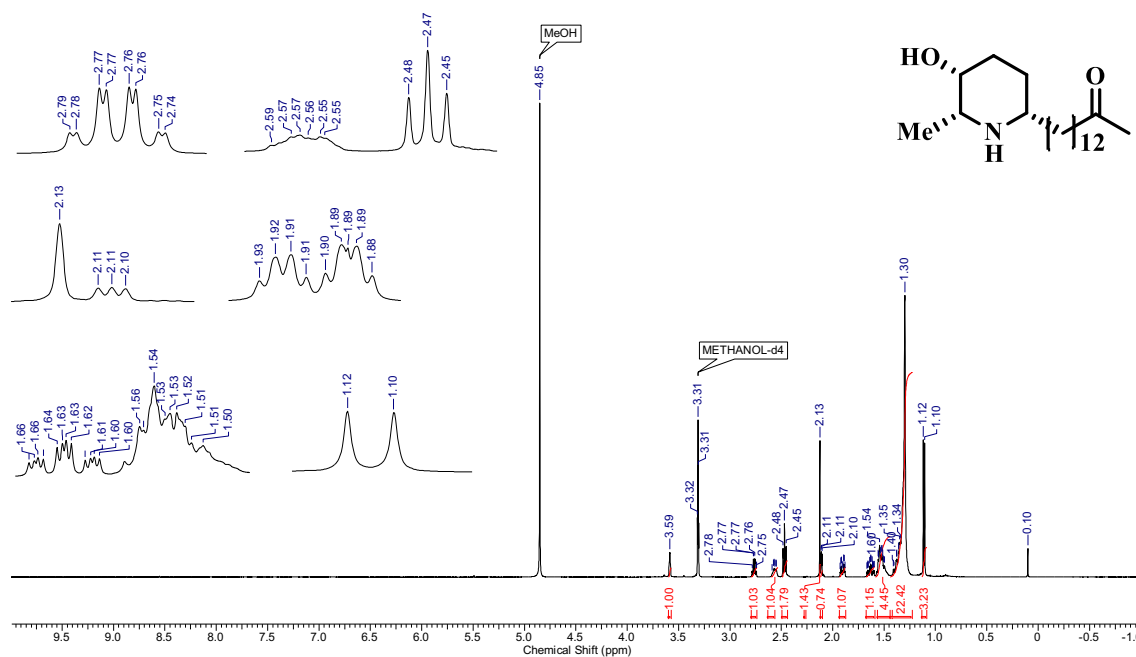

Figure S64. <sup>1</sup>H NMR spectra of compound 3 (±-spectaline) (MeOD, 500 MHz)

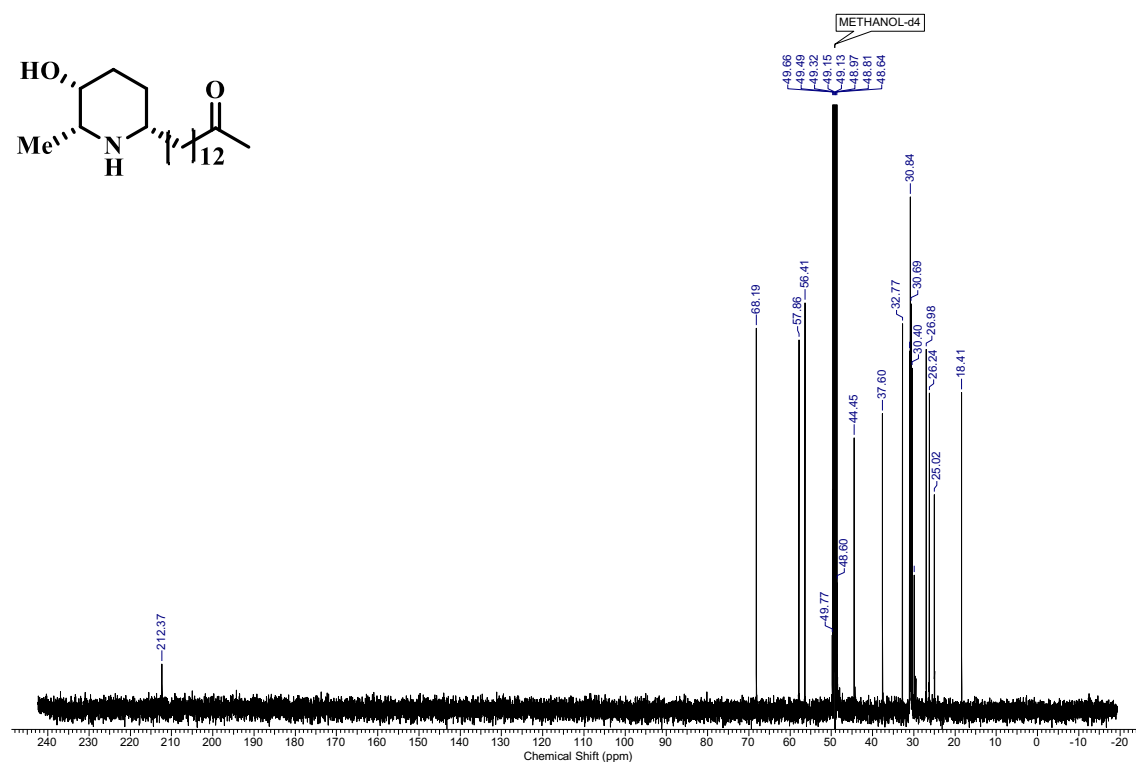

Figure S65. <sup>13</sup>C NMR spectra of compound 3 (±-spectaline) (MeOD, 126 MHz)

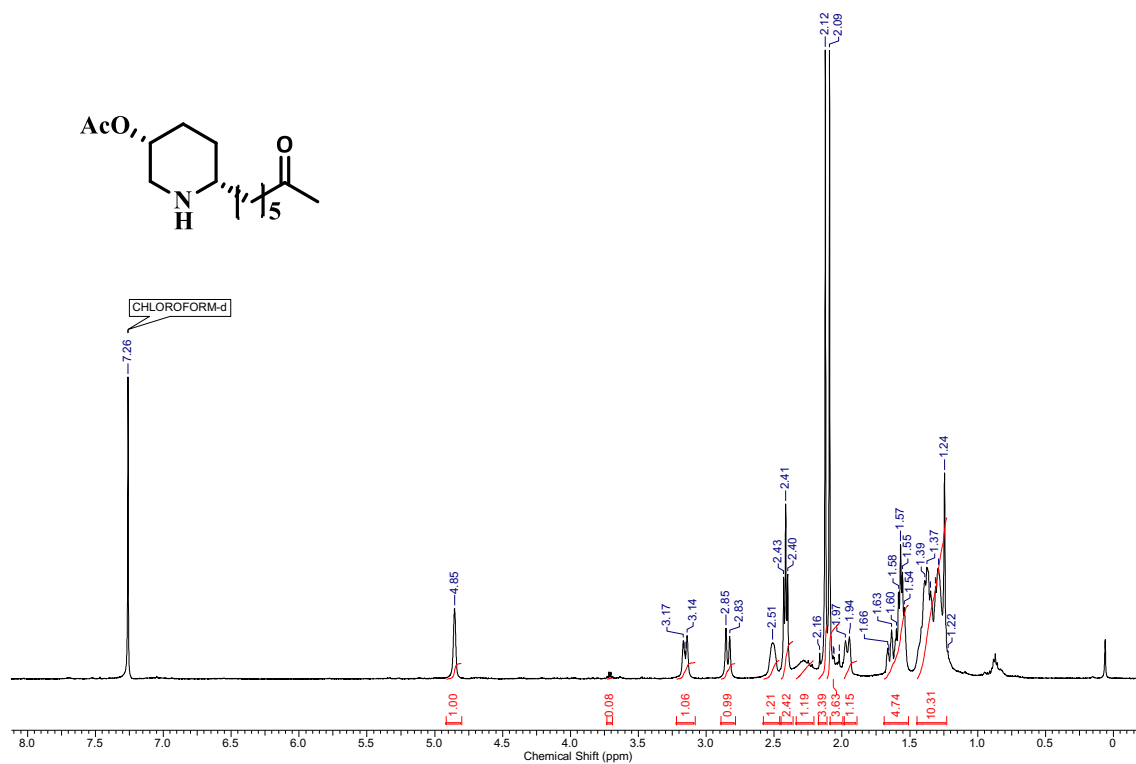

Figure S66. <sup>1</sup>H NMR spectra of compound **13a** (CDCl<sub>3</sub>, 400 MHz)

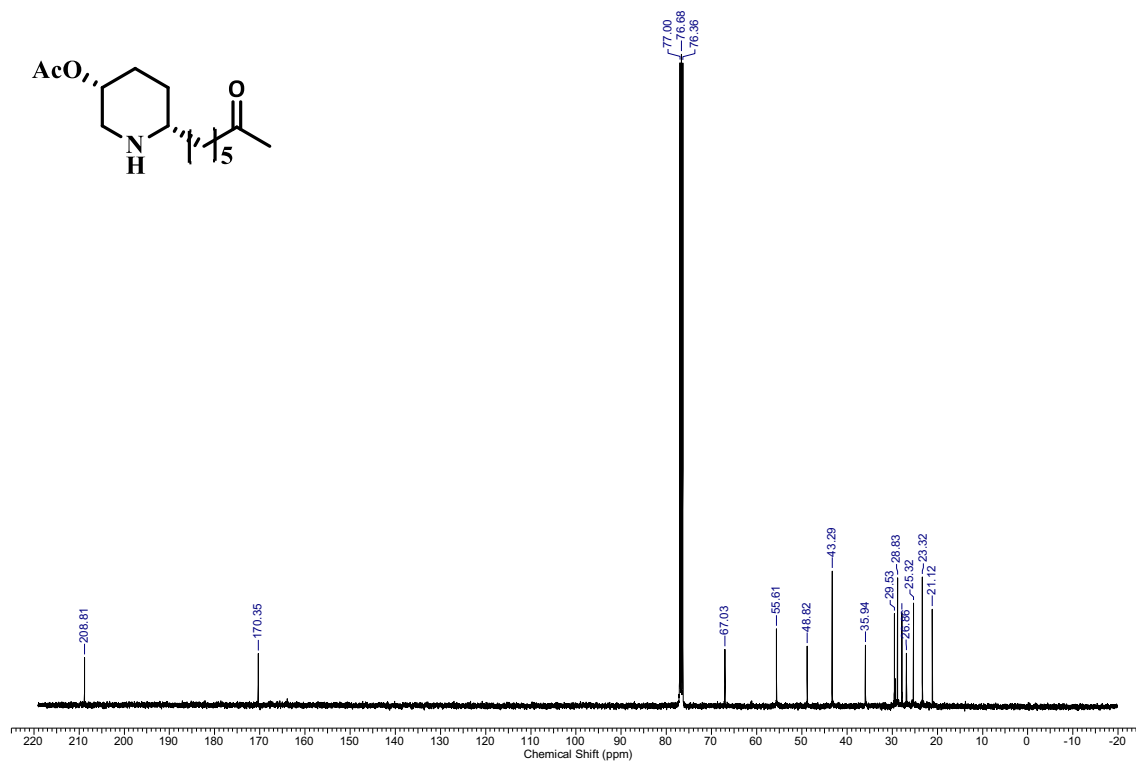

Figure S67. <sup>13</sup>C NMR spectra of compound **13a** (CDCl<sub>3</sub>, 101 MHz)

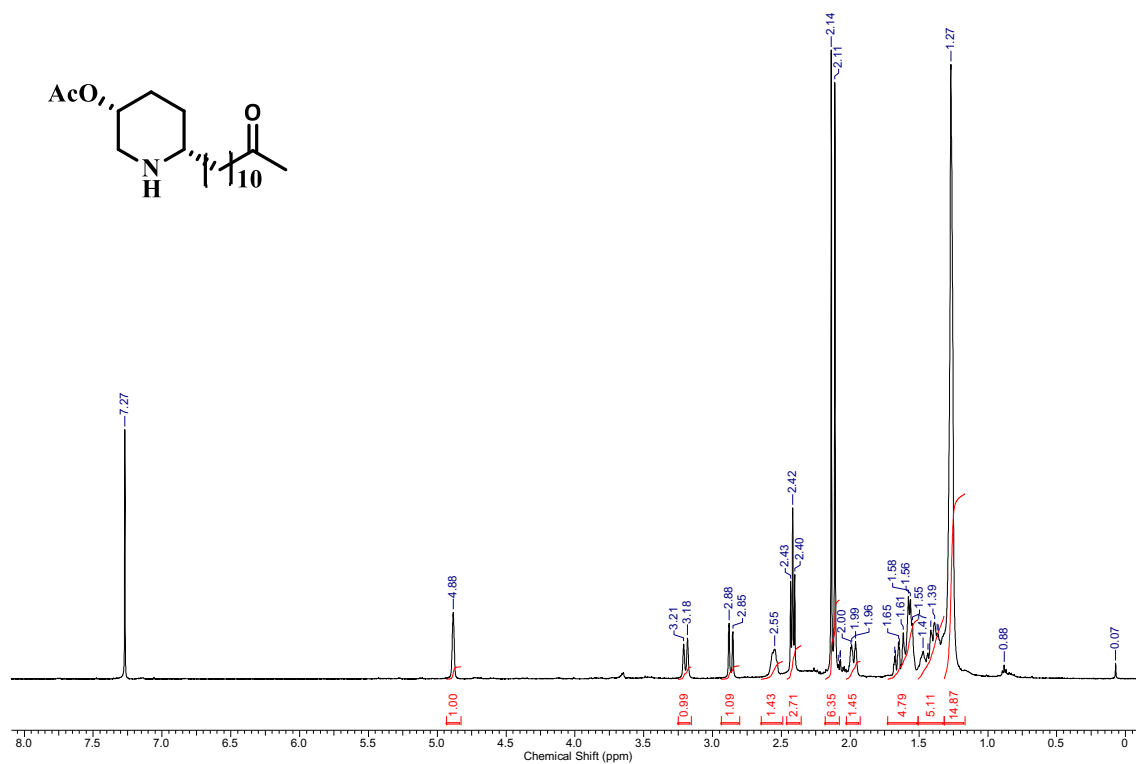

Figure S68. <sup>1</sup>H NMR spectra of compound **13b** (CDCl<sub>3</sub>, 500 MHz)

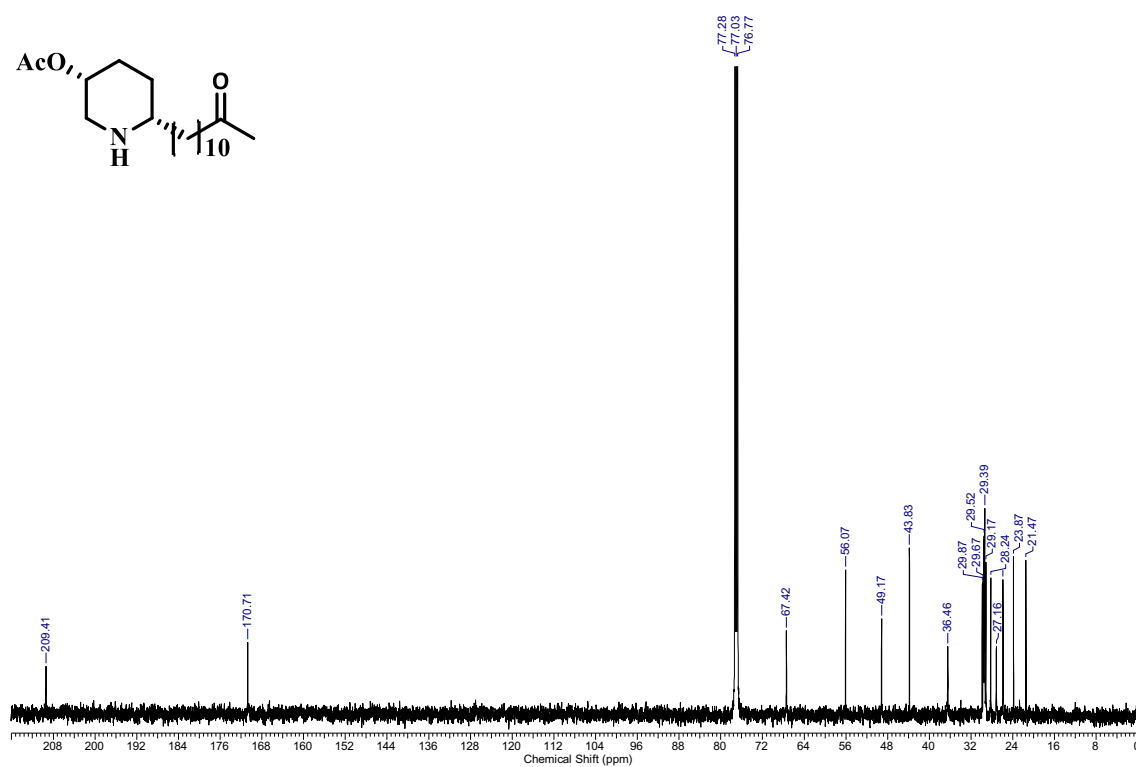

Figure S69. <sup>13</sup>C NMR spectra of compound **13b** (CDCl<sub>3</sub>, 126 MHz)

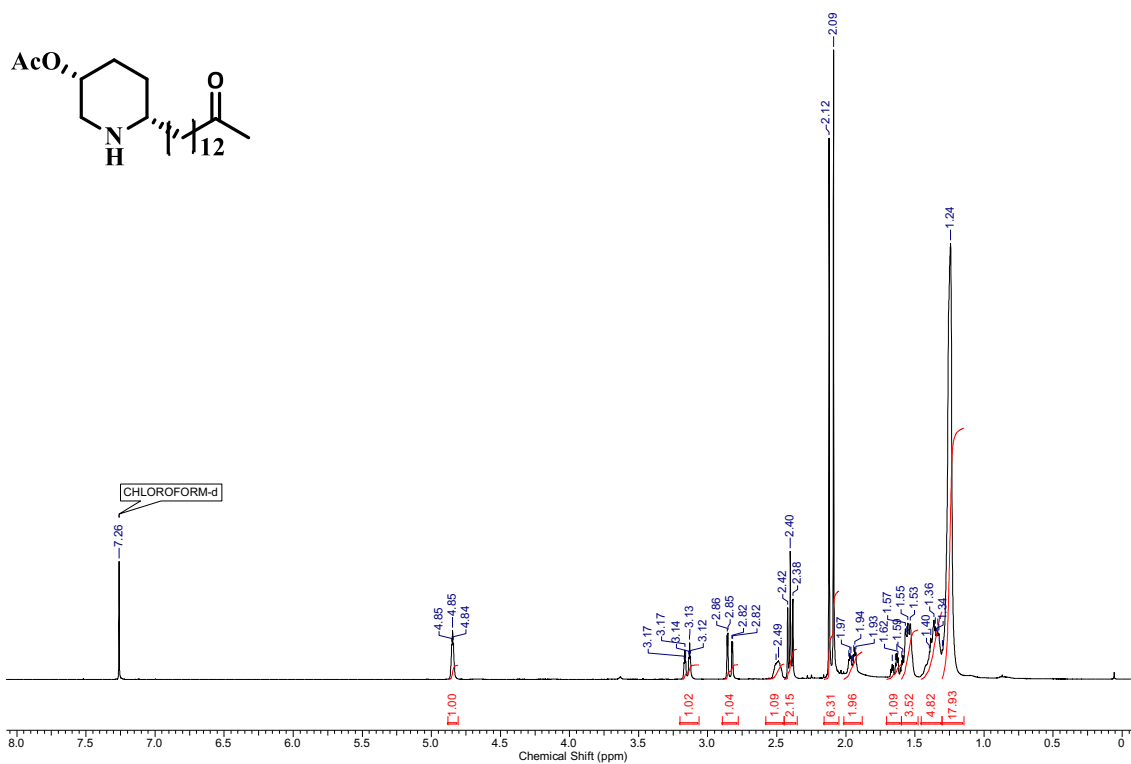

Figure S70.  $^1\text{H}$  NMR spectra of compound **13c** (CDCl<sub>3</sub>, 400 MHz)

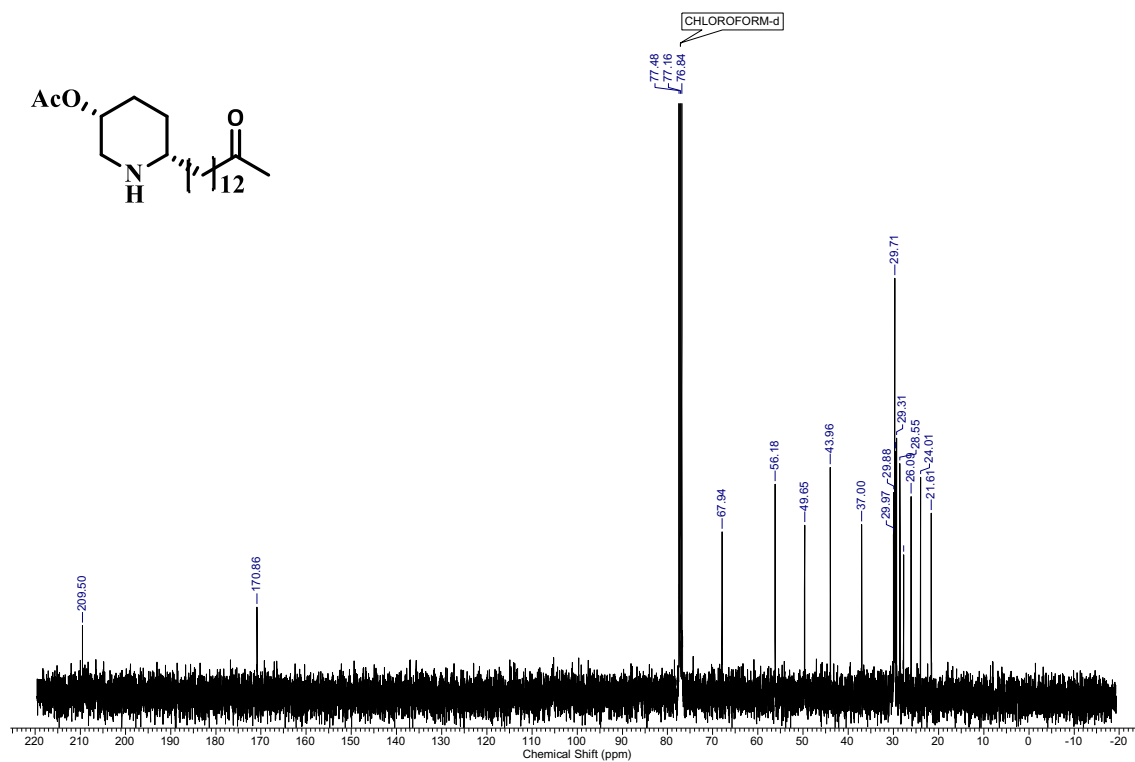

Figure S71.  $^{13}\text{C}$  NMR spectra of compound **13c** (CDCl<sub>3</sub>, 101 MHz)

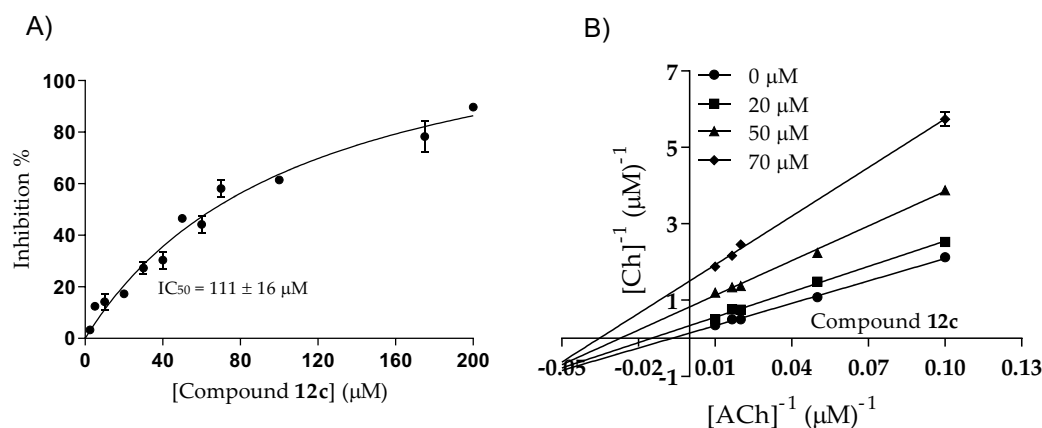

Figure S72. Dose-response inhibition curve (A) and Lineweaver-Burk reciprocal plots (B) for compound **12c** BChE<sub>hu</sub>-ICER using the on-flow dual parallel enzyme assay. Results obtained from three independent experiments (n = 3) expressed by mean ± SEM).

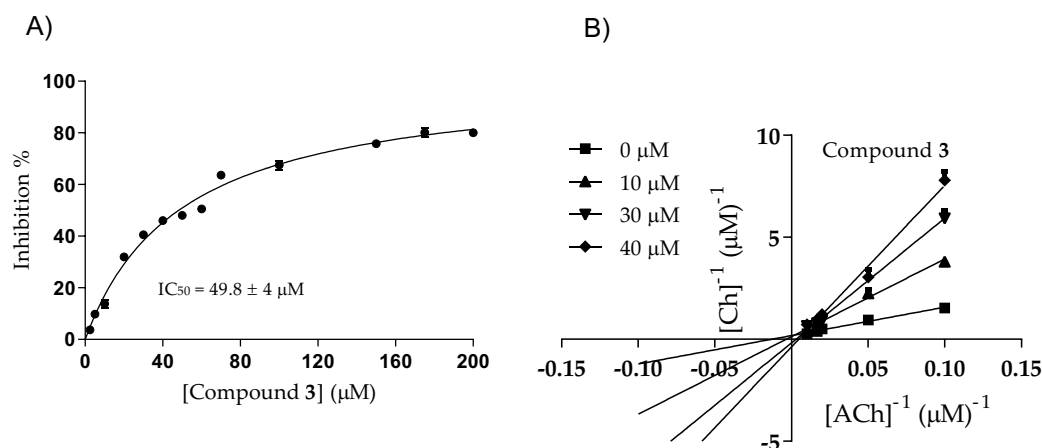

Figure S73. Dose-response inhibition curve (A) and Lineweaver-Burk reciprocal plots (B) for compound **3** BChE<sub>hu</sub>-ICER using the on-flow dual parallel enzyme assay. Results obtained from three independent experiments (n = 3) expressed by mean ± SEM).
